# Supplementary material for: IMP-ICDX: an injury mortality prediction based on ICD-10-CM codes
Source: World J Emerg Surg. 2019 Oct 11;14:46. doi: 10.1186/s13017-019-0265-y (PMC6787998; doi:10.1186/s13017-019-0265-y)
Supplement: Supplementary file 4 — Additional file 4. WMDP values of different ICD-10-CM injury codes. (XLS 1135 kb) [file 13017_2019_265_MOESM4_ESM.xls]

## Sheet: Additional file 4
Additional file 4. WMDP values of different ICD-10-CM injury codes.
Order	ICD-10-CM	TMR	BR	N	WMDP
1	S00.00XA	2.30109	1	1	0.723562
2	S00.01XA	1.09304	1	1	0.597307
3	S00.01XD	0.575188	1	1	0.542217
4	S00.02XA	0.0265803	1	1	0.0954599
5	S00.03XA	1.53929	1	1	0.692077
6	S00.03XD	0.734181	1	1	0.568282
7	S00.03XS	0.147849	1	2	0.345552
8	S00.04XA	0.140124	1	1	0.268451
9	S00.05XA	0.0442906	1	1	0.127069
10	S00.06XA	16.5418	1	1	1.49891
11	S00.07XA	0.374539	1	2	0.590392
12	S00.10XA	1.70742	2	1	0.697824
13	S00.10XD	0.261961	2	2	0.337642
14	S00.11XA	1.73625	2	1	0.71798
15	S00.11XD	0.0214477	2	1	0.062467
16	S00.11XS	0.951226	2	1	0.710352
17	S00.12XA	1.42748	2	1	0.667848
18	S00.12XS	0.883328	2	1	0.668915
19	S00.201A	0.355298	2	1	0.386074
20	S00.202A	1.38061	2	1	0.583923
21	S00.209A	1.96612	2	1	0.628631
22	S00.211A	0.632889	2	1	0.463477
23	S00.212A	0.514636	2	1	0.455527
24	S00.219A	1.04201	2	1	0.488505
25	S00.221A	0.0723255	2	2	0.15204
26	S00.241A	0.210446	2	1	0.450485
27	S00.242A	0.227056	2	2	0.359357
28	S00.251A	0.194357	2	1	0.229229
29	S00.252A	0.0896293	2	2	0.206451
30	S00.30XA	0.169968	2	1	0.314955
31	S00.31XA	0.781764	2	1	0.571402
32	S00.31XD	0.170578	2	1	0.314553
33	S00.32XA	1.80569	2	1	0.878424
34	S00.33XA	0.826655	2	1	0.582089
35	S00.35XA	0.770269	2	1	0.517698
36	S00.37XA	0.243884	2	2	0.450202
37	S00.401A	1.57541	2	1	0.553878
38	S00.402A	4.13546	2	1	0.887768
39	S00.409A	1.9461	2	1	0.636709
40	S00.411A	0.882563	2	1	0.494941
41	S00.412A	0.442295	2	1	0.39912
42	S00.412D	22.0558	2	1	1.51501
43	S00.419A	0.0583638	2	1	0.151452
44	S00.421A	0.103407	2	2	0.23274
45	S00.431A	1.5824	2	1	0.604187
46	S00.432A	1.45715	2	1	0.591385
47	S00.439A	0.919422	2	1	0.489689
48	S00.451A	0.279269	2	2	0.466795
49	S00.452A	0.0189258	2	2	0.0727784
50	S00.501A	0.0454715	2	1	0.121957
51	S00.501S	0.0285485	2	2	0.0921804
52	S00.502A	1.38243	2	1	0.527466
53	S00.511A	0.712052	2	1	0.461386
54	S00.512A	0.620319	2	1	0.443812
55	S00.531A	0.98449	2	1	0.535127
56	S00.532A	2.95678	2	1	0.713735
57	S00.552A	0.0265786	2	1	0.0787413
58	S00.571A	0.032938	2	2	0.10722
59	S00.572A	0.005922	2	1	0.0293013
60	S00.80XA	0.50915	1	1	0.399829
61	S00.81XA	0.837238	1	1	0.519164
62	S00.81XD	4.72624	1	1	0.944584
63	S00.81XS	0.0047788	1	2	0.0229249
64	S00.82XA	0.535498	1	1	0.324145
65	S00.83XA	1.04331	1	1	0.604174
66	S00.83XD	1.35655	1	1	0.77627
67	S00.83XS	0.0073388	1	1	0.0327499
68	S00.84XA	11.0279	1	1	1.22841
69	S00.85XA	0.0372473	1	1	0.110526
70	S00.87XA	6.61674	1	1	0.782196
71	S00.90XA	0.561019	1	1	0.529789
72	S00.91XA	0.99066	1	1	0.554759
73	S00.93XA	1.31711	1	1	0.649005
74	S00.93XD	1.26294	1	1	0.773024
75	S00.95XA	4.13546	1	1	0.760267
76	S00.97XA	1.82548	1	1	0.824789
77	S000	3.54128	1	1	0.814656
78	S001	1.74125	1	1	0.712082
79	S002	0.402299	2	2	0.443545
80	S003	0.0834456	2	1	0.185659
81	S004	0.0230366	2	2	0.0654328
82	S007	0.0329384	1	2	0.097494
83	S008	1.45153	1	1	0.605689
84	S009	16.5418	1	1	1.31309
85	S01.00XA	1.9973	1	1	0.716977
86	S01.01XA	1.29377	1	1	0.650831
87	S01.01XD	0.148228	1	1	0.309774
88	S01.01XS	0.0285484	1	2	0.0918333
89	S01.02XA	1.15017	1	1	0.54184
90	S01.02XD	1.45709	1	2	0.898432
91	S01.03XA	2.01125	1	1	0.607088
92	S01.04XA	6.24927	1	1	0.870533
93	S01.04XD	0.663612	1	1	0.59132
94	S01.05XA	0.148746	1	1	0.263076
95	S01.101A	0.395094	2	1	0.423955
96	S01.102A	0.119063	2	1	0.244189
97	S01.109A	2.5449	2	1	0.945348
98	S01.111A	0.604793	2	1	0.489503
99	S01.111D	0.302232	2	2	0.407509
100	S01.112A	0.634304	2	1	0.499995
101	S01.112D	0.432117	2	1	0.566704
102	S01.112S	0.038001	2	1	0.0934933
103	S01.119A	0.738828	2	1	0.509692
104	S01.119D	0.243884	2	2	0.36124
105	S01.121A	0.524413	2	1	0.384625
106	S01.122A	0.147945	2	1	0.243804
107	S01.129A	0.0543365	2	1	0.134099
108	S01.131A	0.0525957	2	1	0.129569
109	S01.132A	0.0495285	2	1	0.118795
110	S01.139A	0.0342729	2	1	0.0982426
111	S01.141A	7.09163	2	1	0.728619
112	S01.142A	0.0207973	2	1	0.0586066
113	S01.151A	8.27092	2	1	0.951976
114	S01.152A	0.361509	2	1	0.360757
115	S01.159A	1.10415	2	1	0.499946
116	S01.20XA	0.910841	2	1	0.553651
117	S01.21XA	0.663423	2	1	0.524615
118	S01.22XA	0.272952	2	1	0.372701
119	S01.23XA	2.28371	2	1	0.689153
120	S01.24XA	0.0203819	2	1	0.0666904
121	S01.25XA	1.40965	2	1	0.580175
122	S01.301A	0.465963	2	1	0.408367
123	S01.302A	1.34167	2	1	0.569325
124	S01.309A	0.0776876	2	1	0.19971
125	S01.311A	1.05478	2	1	0.532607
126	S01.311D	0.302232	2	1	0.41835
127	S01.312A	1.00992	2	1	0.522226
128	S01.312D	0.182412	2	1	0.26639
129	S01.319A	1.14375	2	1	0.546414
130	S01.321A	1.18156	2	1	0.536809
131	S01.322A	0.0609455	2	1	0.15872
132	S01.329A	2.75697	2	1	0.739657
133	S01.331A	1.75551	2	1	0.615788
134	S01.332A	3.97004	2	1	0.632984
135	S01.339A	0.0199675	2	1	0.072554
136	S01.341A	0.0380026	2	1	0.117859
137	S01.342A	0.0522194	2	1	0.149448
138	S01.351A	0.0922141	2	1	0.176153
139	S01.352A	0.0895733	2	1	0.167383
140	S01.401A	0.696769	2	1	0.471003
141	S01.402A	2.14248	2	1	0.649251
142	S01.409A	1.69113	2	1	0.60295
143	S01.411A	0.722462	2	1	0.453128
144	S01.411D	0.26196	2	2	0.337642
145	S01.411S	0.103407	2	2	0.178969
146	S01.412A	0.66715	2	1	0.431309
147	S01.412D	0.198789	2	1	0.324951
148	S01.419A	0.729686	2	1	0.463716
149	S01.421A	0.290517	2	1	0.329566
150	S01.422A	0.032035	2	1	0.096873
151	S01.429A	1.10279	2	1	0.592586
152	S01.431A	0.946094	2	1	0.561549
153	S01.432A	1.18247	2	1	0.540122
154	S01.432D	0.0247443	2	1	0.0883286
155	S01.439A	0.0679279	2	1	0.145201
156	S01.441A	2.13652	2	1	0.605431
157	S01.442A	1.94775	2	1	0.667614
158	S01.449A	0.0470996	2	1	0.11382
159	S01.451A	0.0896286	2	1	0.148695
160	S01.452A	0.0660122	2	1	0.151114
161	S01.501A	1.12582	2	1	0.539655
162	S01.502A	2.32218	2	1	0.687658
163	S01.511A	0.68896	2	1	0.459848
164	S01.511D	0.0962718	2	1	0.20718
165	S01.512A	0.820756	2	1	0.470631
166	S01.512D	0.0185901	2	2	0.0645229
167	S01.521A	0.679844	2	1	0.441467
168	S01.522A	1.81806	2	1	0.594803
169	S01.531A	2.55177	2	1	0.673545
170	S01.532A	1.00281	2	1	0.535415
171	S01.541A	0.05635	2	1	0.162935
172	S01.542A	0.0394784	2	1	0.119691
173	S01.551A	0.0323227	2	1	0.0978513
174	S01.552A	2.9475	2	1	0.777878
175	S01.80XA	1.6876	2	1	0.663149
176	S01.81XA	0.891637	2	1	0.56155
177	S01.81XD	0.261961	2	1	0.451864
178	S01.81XS	0.158806	2	1	0.216782
179	S01.82XA	0.656338	2	1	0.428723
180	S01.83XA	4.76982	2	1	0.753421
181	S01.84XA	6.36945	2	1	0.876912
182	S01.85XA	0.195302	2	1	0.346375
183	S01.90XA	3.03561	2	1	0.778479
184	S01.91XA	0.991933	2	1	0.618939
185	S01.92XA	1.9461	2	1	0.630091
186	S01.93XA	12.4532	2	1	1.15439
187	S01.94XA	9.45431	2	1	0.948279
188	S0100	3.83203	2	1	0.803646
189	S0110	1.43842	2	1	0.82245
190	S0120	0.119612	2	1	0.227226
191	S0130	4.13546	2	1	0.874331
192	S0140	0.133742	2	1	0.254209
193	S0141	0.113195	2	1	0.233955
194	S0150	1.25687	2	1	0.62386
195	S0151	0.418865	2	2	0.525645
196	S0170	0.0470943	2	1	0.148387
197	S0180	0.832074	2	1	0.519156
198	S0181	0.0461481	2	1	0.143749
199	S0190	0.0199689	2	1	0.0543218
200	S02.0XXA	3.35766	1	1	0.771342
201	S02.0XXB	10.5281	1	1	1.30908
202	S02.0XXD	0.137647	1	1	0.28154
203	S02.101A	2.99154	1	1	0.771009
204	S02.101B	15.5688	1	1	1.46661
205	S02.102A	2.42623	1	1	0.711921
206	S02.102B	5.51395	1	1	1.15786
207	S02.109A	4.8978	1	1	1.01014
208	S02.109B	12.8295	1	1	1.51858
209	S02.10XA	3.86645	1	1	0.877351
210	S02.10XB	9.7224	1	1	1.33005
211	S02.110A	3.18144	1	1	0.718242
212	S02.110B	0.0214487	1	1	0.0748491
213	S02.111A	5.31784	1	1	0.937288
214	S02.111B	11.0279	1	1	1.4649
215	S02.112A	2.86301	1	1	0.736696
216	S02.112B	3.31764	1	1	0.801151
217	S02.113A	2.93069	1	1	0.78547
218	S02.113B	6.48091	1	1	1.20139
219	S02.118A	3.68955	1	1	0.840978
220	S02.118B	6.95076	1	1	1.18463
221	S02.119A	3.01061	1	1	0.75623
222	S02.119B	10.2069	1	1	1.23366
223	S02.119D	1.68109	1	1	0.977292
224	S02.11AA	0.282097	1	1	0.475978
225	S02.11BA	0.242306	1	1	0.410744
226	S02.11BB	0.0230365	1	1	0.0802253
227	S02.11CA	0.0747994	1	2	0.196504
228	S02.11DA	0.0673348	1	1	0.161165
229	S02.11EA	0.0306649	1	2	0.109077
230	S02.11EB	0.0150016	1	2	0.07645
231	S02.11FA	0.0353807	1	1	0.105181
232	S02.11GA	4.72661	1	1	0.978298
233	S02.11GB	0.038754	1	1	0.11217
234	S02.11HA	3.18898	1	1	0.785982
235	S02.11HB	4.72624	1	1	0.793549
236	S02.19XA	3.20744	1	1	0.777547
237	S02.19XB	9.91545	1	1	1.29844
238	S02.19XD	1.26294	1	1	0.782908
239	S02.2XXA	1.21854	2	1	0.593708
240	S02.2XXB	1.27746	2	1	0.598908
241	S02.2XXD	0.0541775	2	1	0.146212
242	S02.2XXG	0.243885	2	2	0.346067
243	S02.2XXS	0.12563	2	2	0.2624
244	S02.30XA	1.12617	2	1	0.561301
245	S02.30XB	0.037667	2	2	0.121656
246	S02.31XA	1.35282	2	1	0.628228
247	S02.31XB	2.64669	2	1	0.67972
248	S02.32XA	0.930243	2	1	0.537969
249	S02.32XB	1.27245	2	1	0.699558
250	S02.3XXA	0.929405	2	1	0.516158
251	S02.3XXB	3.49354	2	1	0.833568
252	S02.3XXD	0.111072	2	1	0.288441
253	S02.3XXS	0.170577	2	2	0.294909
254	S02.400A	1.5026	2	1	0.6325
255	S02.400B	5.9078	2	1	1.16979
256	S02.401A	1.70514	2	1	0.647447
257	S02.401B	2.9507	2	1	0.847222
258	S02.401D	0.227055	2	2	0.335398
259	S02.401S	1.35655	2	1	0.802828
260	S02.402A	2.19294	2	1	0.710573
261	S02.402B	3.37047	2	1	0.832831
262	S02.402D	0.111072	2	2	0.294414
263	S02.40AA	0.0776872	2	1	0.153022
264	S02.40AB	0.0230364	2	2	0.10113
265	S02.40BA	3.48249	2	1	0.735245
266	S02.40CA	1.6951	2	1	0.680801
267	S02.40CB	2.91915	2	1	0.898235
268	S02.40CD	0.047094	2	2	0.174383
269	S02.40DA	1.38521	2	1	0.649467
270	S02.40DB	1.37849	2	1	0.517441
271	S02.40EA	2.12987	2	1	0.696404
272	S02.40EB	6.30165	2	1	0.974539
273	S02.40ED	0.0470939	2	2	0.174383
274	S02.40FA	2.12458	2	1	0.716445
275	S02.40FB	1.65418	2	1	0.725506
276	S02.411A	1.20771	2	1	0.620435
277	S02.411B	1.42039	2	1	0.721279
278	S02.412A	2.66767	2	1	0.810902
279	S02.412B	3.21767	2	1	1.00019
280	S02.412G	0.0776857	2	2	0.182504
281	S02.413A	3.40833	2	1	0.961522
282	S02.413B	4.90129	2	1	1.13974
283	S02.42XA	0.755222	2	1	0.44078
284	S02.42XB	0.888153	2	1	0.5047
285	S02.42XD	0.111072	2	2	0.292368
286	S02.5XXA	0.69171	2	1	0.429061
287	S02.5XXB	0.7238	2	1	0.457038
288	S02.600A	0.961152	2	1	0.449084
289	S02.600B	0.655352	2	1	0.376487
290	S02.601A	1.86613	2	1	0.585807
291	S02.601B	0.0223029	2	1	0.0747223
292	S02.602A	0.450889	2	1	0.352091
293	S02.602B	0.0296682	2	1	0.0868359
294	S02.609A	1.78254	2	1	0.550138
295	S02.609B	1.80495	2	1	0.613967
296	S02.610A	1.11998	2	1	0.500657
297	S02.610B	3.67596	2	1	0.868179
298	S02.611A	1.53217	2	1	0.614494
299	S02.611B	3.00761	2	1	0.635
300	S02.612A	1.32388	2	1	0.548601
301	S02.612B	0.0583626	2	1	0.142591
302	S02.61XA	1.01268	2	1	0.523842
303	S02.61XB	0.889882	2	1	0.505516
304	S02.620A	0.0490916	2	1	0.136661
305	S02.620B	0.0201738	2	1	0.0631595
306	S02.621A	0.651491	2	1	0.397894
307	S02.621B	0.0527302	2	1	0.145962
308	S02.622A	0.0642579	2	1	0.146924
309	S02.622B	0.0838029	2	1	0.187536
310	S02.622G	0.103407	2	1	0.253577
311	S02.62XA	0.154741	2	1	0.224554
312	S02.62XB	0.390597	2	1	0.313402
313	S02.630A	0.128477	2	2	0.236904
314	S02.630B	0.122164	2	1	0.226393
315	S02.631A	1.9461	2	1	0.647217
316	S02.631B	0.0150019	2	1	0.0522689
317	S02.632A	0.0673359	2	1	0.168884
318	S02.63XA	1.38773	2	1	0.567981
319	S02.63XB	0.6487	2	1	0.456977
320	S02.640A	1.10624	2	1	0.518817
321	S02.640B	0.0239879	2	1	0.0822626
322	S02.641A	1.03787	2	1	0.427117
323	S02.641B	2.2099	2	1	0.634926
324	S02.641G	0.103407	2	1	0.253577
325	S02.642A	1.25743	2	1	0.497988
326	S02.642B	0.0470958	2	1	0.118043
327	S02.64XA	1.03484	2	1	0.454991
328	S02.64XB	0.983252	2	1	0.508655
329	S02.650A	0.0251146	2	1	0.0789747
330	S02.650B	0.0379423	2	1	0.0971098
331	S02.651A	0.425149	2	1	0.315922
332	S02.651B	0.0281215	2	1	0.0843034
333	S02.651D	0.0776856	2	1	0.17175
334	S02.652A	0.26109	2	1	0.269957
335	S02.652B	0.0244588	2	1	0.0751008
336	S02.65XA	0.555884	2	1	0.344969
337	S02.65XB	0.489748	2	1	0.329557
338	S02.66XA	0.553293	2	1	0.342987
339	S02.66XB	0.347897	2	1	0.299752
340	S02.670A	0.0318038	2	1	0.0913484
341	S02.670B	0.0173076	2	2	0.0638328
342	S02.671A	3.67596	2	1	0.844121
343	S02.671B	6.61674	2	1	1.06629
344	S02.672A	0.0161139	2	2	0.0598368
345	S02.672B	0.0505859	2	2	0.140714
346	S02.67XA	0.48681	2	1	0.381769
347	S02.67XB	0.0236141	2	1	0.0800294
348	S02.69XA	1.01174	2	1	0.468994
349	S02.69XB	1.27022	2	1	0.502364
350	S02.80XA	3.41619	2	1	0.82362
351	S02.80XB	3.51582	2	1	0.751982
352	S02.81XA	2.30844	2	1	0.723731
353	S02.81XB	6.50199	2	1	1.17897
354	S02.82XA	1.5471	2	1	0.652904
355	S02.82XB	5.36492	2	1	1.11158
356	S02.8XXA	1.88484	2	1	0.648205
357	S02.8XXB	5.73761	2	1	1.11586
358	S02.8XXD	0.281377	2	1	0.397816
359	S02.91XA	4.05116	1	1	0.851529
360	S02.91XB	19.0572	1	1	1.65171
361	S02.91XD	0.009094	1	2	0.0393872
362	S02.92XA	2.49702	2	1	0.718899
363	S02.92XB	3.84834	2	1	1.02432
364	S02.92XD	1.11046	2	1	0.675751
365	S02000	5.68626	1	1	0.917479
366	S02001	1.65418	1	1	0.7935
367	S02100	5.9381	1	1	0.898095
368	S02101	4.13546	1	1	0.851591
369	S02200	1.61255	2	1	0.661384
370	S02201	1.68109	2	2	1.01014
371	S02300	1.35035	2	1	0.563608
372	S02301	0.0247455	2	2	0.106982
373	S02400	3.15083	2	1	0.753404
374	S02410	3.98254	2	1	0.728216
375	S02411	0.0380009	2	1	0.146508
376	S02430	6.61674	2	1	1.24892
377	S02480	2.00041	2	1	0.659095
378	S025	0.0585131	2	1	0.173096
379	S02600	1.83798	2	1	0.742119
380	S02601	2.20558	2	1	0.646265
381	S02610	0.10779	2	1	0.216506
382	S02611	0.302232	2	2	0.488794
383	S02620	0.0543355	2	1	0.139857
384	S02621	0.137647	2	1	0.329893
385	S02700	4.14113	2	1	0.867887
386	S02701	0.0150015	2	2	0.076943
387	S02800	0.0412391	2	2	0.12171
388	S02801	0.0150014	2	2	0.0769426
389	S02810	0.227056	2	2	0.420033
390	S02811	0.0150013	2	2	0.0769422
391	S02890	3.1016	2	1	0.78296
392	S02891	0.132667	2	2	0.30941
393	S02900	4.72624	2	1	0.980541
394	S03.00XA	0.0778864	2	2	0.187628
395	S03.01XA	1.43842	2	1	0.555941
396	S03.02XA	3.67596	2	1	0.59987
397	S03.03XA	3.67596	2	1	0.842224
398	S03.0XXA	2.07206	2	1	0.662639
399	S03.0XXS	0.196801	2	2	0.410136
400	S03.1XXA	0.132899	2	1	0.236554
401	S03.2XXA	0.802249	2	1	0.445006
402	S03.40XA	11.0279	2	1	1.03253
403	S03.41XA	0.0962727	2	2	0.255677
404	S03.42XA	7.35193	2	1	1.0111
405	S03.4XXA	3.21441	2	1	0.70103
406	S03.8XXA	2.37629	6	1	0.686468
407	S03.9XXA	0.0505848	6	1	0.130884
408	S030	0.0788728	2	1	0.186696
409	S031	0.0285483	2	2	0.0905728
410	S032	2.06773	2	1	0.586404
411	S034	7.35193	2	1	1.17108
412	S04.011A	3.09219	1	1	0.718164
413	S04.012A	3.28311	1	1	0.789823
414	S04.019A	3.86692	1	1	0.922864
415	S04.032A	0.0380008	2	1	0.0999093
416	S04.039A	16.5418	1	2	1.39886
417	S04.042A	0.0285482	1	2	0.123803
418	S04.10XA	1.37849	1	1	0.66018
419	S04.11XA	0.050587	1	1	0.125523
420	S04.12XA	0.0650129	1	1	0.170419
421	S04.20XA	0.0929523	1	2	0.224452
422	S04.21XA	3.00761	1	1	0.56464
423	S04.22XA	0.0834453	1	1	0.124608
424	S04.30XA	0.0626882	1	2	0.160387
425	S04.31XA	2.06773	1	1	0.611437
426	S04.32XA	0.0353812	1	1	0.0856472
427	S04.40XA	0.128149	1	1	0.223557
428	S04.41XA	0.036693	1	1	0.122422
429	S04.42XA	0.0353814	1	1	0.104384
430	S04.50XA	0.413727	1	1	0.355222
431	S04.51XA	0.895735	1	1	0.511747
432	S04.51XS	1.09466	1	1	0.750404
433	S04.52XA	0.229926	1	1	0.25347
434	S04.60XA	4.72624	1	1	0.878415
435	S04.61XA	0.0896292	1	2	0.201446
436	S04.62XA	0.0776867	1	1	0.207526
437	S04.70XA	0.0559985	1	2	0.165409
438	S04.71XA	0.032937	1	2	0.118644
439	S04.72XA	0.0161135	1	2	0.0513443
440	S04.811A	0.0723254	1	2	0.217128
441	S04.819A	9.45248	1	1	1.2327
442	S04.891A	3.48249	1	1	1.07732
443	S04.892A	2.36312	1	1	0.907683
444	S04.892S	0.0265785	1	2	0.0729404
445	S04.899A	5.51395	1	1	1.24426
446	S04.9XXA	0.0456599	1	1	0.125516
447	S04.9XXD	0.0306632	1	1	0.0958793
448	S0408	0.0671391	1	2	0.202979
449	S0418	0.035379	1	2	0.13963
450	S0428	0.26196	1	3	0.46965
451	S0448	0.0214486	1	2	0.0970916
452	S0450	0.0505842	1	2	0.18971
453	S0458	0.0589613	1	2	0.1409
454	S0470	0.0285481	1	2	0.112489
455	S05.00XA	0.833683	2	1	0.46597
456	S05.01XA	0.806183	2	1	0.438665
457	S05.02XA	0.684162	2	1	0.420318
458	S05.10XA	1.12518	2	1	0.537956
459	S05.11XA	1.35	2	1	0.589437
460	S05.11XD	0.0306631	2	2	0.101454
461	S05.12XA	1.39969	2	1	0.63023
462	S05.12XD	0.119305	2	2	0.22811
463	S05.20XA	0.640122	2	1	0.426723
464	S05.21XA	0.719671	2	1	0.427558
465	S05.22XA	0.700188	2	1	0.422963
466	S05.30XA	1.36677	2	1	0.530845
467	S05.31XA	0.467479	2	1	0.355516
468	S05.31XD	0.147849	2	2	0.329283
469	S05.32XA	1.1506	2	1	0.482349
470	S05.32XD	0.0247442	2	1	0.074098
471	S05.40XA	5.51494	2	1	0.757664
472	S05.41XA	1.17008	2	1	0.495954
473	S05.42XA	1.37892	2	1	0.469511
474	S05.50XA	0.0245576	2	1	0.0743441
475	S05.51XA	0.421003	2	1	0.330933
476	S05.52XA	0.39481	2	1	0.310647
477	S05.60XA	1.30613	2	1	0.853262
478	S05.61XA	0.041066	2	1	0.10303
479	S05.62XA	0.0254063	2	1	0.0703703
480	S05.70XA	5.51395	2	1	1.07563
481	S05.71XA	4.41116	2	1	0.95747
482	S05.71XS	1.26294	2	1	0.80398
483	S05.72XA	4.13546	2	1	0.971887
484	S05.8X1A	1.22149	2	1	0.511319
485	S05.8X2A	1.20426	2	1	0.495948
486	S05.8X2D	0.0150012	2	2	0.0779161
487	S05.8X9A	1.03545	2	1	0.510251
488	S05.90XA	2.17905	2	1	0.682171
489	S05.90XD	16.5418	2	1	0.830656
490	S05.91XA	1.47274	2	1	0.620953
491	S05.91XD	1.09466	2	2	0.699542
492	S05.92XA	1.41437	2	1	0.596458
493	S050	0.225698	2	1	0.408249
494	S051	11.0279	2	1	1.42643
495	S052	0.374539	2	2	0.423107
496	S053	0.0230391	2	1	0.0864875
497	S057	0.0150011	2	2	0.0777604
498	S058	0.114349	2	1	0.221549
499	S059	4.88644	2	1	0.663061
500	S06.0X0A	0.105003	1	1	0.205731
501	S06.0X0D	0.137647	1	1	0.2566
502	S06.0X0S	0.0240152	1	2	0.0890292
503	S06.0X1A	0.147677	1	1	0.24863
504	S06.0X1D	0.56774	1	1	0.644791
505	S06.0X1S	0.015001	1	2	0.0550563
506	S06.0X2A	0.401536	1	1	0.392611
507	S06.0X3A	3.11631	1	1	1.04849
508	S06.0X4A	0.0414345	1	1	0.161878
509	S06.0X5A	0.044475	1	1	0.173207
510	S06.0X6A	12.6746	1	1	1.54958
511	S06.0X7A	13.465	1	1	1.16957
512	S06.0X7S	16.5418	1	1	1.44855
513	S06.0X8A	20.4141	1	1	1.59458
514	S06.0X8S	0.0130031	1	2	0.0526339
515	S06.0X9A	0.255953	1	1	0.32429
516	S06.0X9D	0.348695	1	2	0.455233
517	S06.0X9S	0.196801	1	2	0.31356
518	S06.1X0A	4.41578	1	1	1.05626
519	S06.1X0D	0.243884	1	2	0.496993
520	S06.1X1A	2.24054	1	1	0.795049
521	S06.1X2A	9.3313	1	1	1.41645
522	S06.1X3A	3.85976	1	1	1.19409
523	S06.1X3S	16.5418	1	1	1.67732
524	S06.1X4A	15.2908	1	1	1.60418
525	S06.1X5A	5.48244	1	1	1.30413
526	S06.1X6A	8.1583	1	1	1.41919
527	S06.1X7A	32.6882	1	1	1.86977
528	S06.1X7D	26.4669	1	1	1.67282
529	S06.1X8A	32.3557	1	1	1.87874
530	S06.1X9A	9.95572	1	1	1.43441
531	S06.2X0A	2.97013	1	1	0.922112
532	S06.2X1A	1.33644	1	1	0.676041
533	S06.2X2A	9.02282	1	1	1.28207
534	S06.2X3A	3.81909	1	1	1.14448
535	S06.2X4A	3.01504	1	1	1.12048
536	S06.2X5A	7.44166	1	1	1.39262
537	S06.2X5S	0.0230363	1	2	0.106689
538	S06.2X6A	4.25054	1	1	1.24962
539	S06.2X6D	0.158806	1	2	0.402133
540	S06.2X7A	33.4139	1	1	1.88636
541	S06.2X8A	33.5043	1	1	1.88288
542	S06.2X9A	3.26091	1	1	1.09732
543	S06.2X9D	0.315036	1	1	0.409181
544	S06.300A	1.53807	1	1	0.773785
545	S06.301A	0.501313	1	1	0.485911
546	S06.302A	8.28601	1	1	1.1088
547	S06.303A	0.049224	1	1	0.180245
548	S06.304A	0.136047	1	1	0.35532
549	S06.305A	0.0265799	1	2	0.119834
550	S06.306A	6.61674	1	1	1.36254
551	S06.307A	31.7526	1	1	1.87756
552	S06.308A	31.0628	1	1	1.84879
553	S06.308S	16.5418	1	1	1.61906
554	S06.309A	1.67255	1	1	0.780233
555	S06.309S	0.498547	1	1	0.520023
556	S06.310A	0.95162	1	1	0.632558
557	S06.311A	0.493954	1	1	0.482641
558	S06.312A	1.74125	1	1	0.859091
559	S06.313A	4.86797	1	1	1.24714
560	S06.314A	6.10776	1	1	1.30195
561	S06.315A	5.78161	1	1	1.32456
562	S06.316A	10.2996	1	1	1.45376
563	S06.316D	0.0173075	1	2	0.0855832
564	S06.317A	33.0471	1	1	1.8784
565	S06.318A	31.1932	1	1	1.89685
566	S06.319A	2.7441	1	1	0.836076
567	S06.319S	0.0353784	1	1	0.138687
568	S06.320A	1.35185	1	1	0.710833
569	S06.320D	2.08328	1	1	0.975461
570	S06.321A	0.550532	1	1	0.494439
571	S06.322A	0.88179	1	1	0.628866
572	S06.323A	3.69503	1	1	1.16397
573	S06.324A	10.1385	1	1	1.43012
574	S06.325A	4.14255	1	1	1.24691
575	S06.326A	9.54993	1	1	1.44846
576	S06.327A	32.726	1	1	1.87767
577	S06.328A	32.6601	1	1	1.91217
578	S06.329A	2.77512	1	1	0.840387
579	S06.330A	1.89265	1	1	0.735686
580	S06.331A	0.479063	1	1	0.470052
581	S06.331D	0.464145	1	2	0.549991
582	S06.332A	4.13546	1	1	1.04618
583	S06.333A	3.31311	1	1	1.04742
584	S06.334A	15.486	1	1	1.59403
585	S06.335A	2.75697	1	1	1.10225
586	S06.336A	12.5402	1	1	1.50921
587	S06.337A	34.6333	1	1	1.92151
588	S06.338A	31.4295	1	1	1.88025
589	S06.339A	3.80097	1	1	0.964952
590	S06.340A	2.09123	1	1	0.845515
591	S06.341A	1.41051	1	1	0.718639
592	S06.341D	0.0353783	1	2	0.113885
593	S06.342A	3.66604	1	1	0.981007
594	S06.342D	16.5418	1	1	1.799
595	S06.343A	2.8809	1	1	1.10437
596	S06.344A	9.07133	1	1	1.42022
597	S06.344S	1.09466	1	2	0.950334
598	S06.345A	4.77169	1	1	1.28285
599	S06.346A	10.0588	1	1	1.4938
600	S06.347A	33.2027	1	1	1.89902
601	S06.348A	32.1194	1	1	1.91173
602	S06.349A	3.79105	1	1	1.00167
603	S06.349S	0.0896282	1	2	0.269458
604	S06.350A	2.1571	1	1	0.860577
605	S06.350D	2.08328	1	1	0.975461
606	S06.351A	1.18801	1	1	0.660114
607	S06.352A	2.30013	1	1	0.859151
608	S06.353A	2.40619	1	1	1.00503
609	S06.354A	9.78531	1	1	1.50228
610	S06.355A	4.86525	1	1	1.28567
611	S06.356A	7.03475	1	1	1.38891
612	S06.357A	33.0221	1	1	1.90502
613	S06.358A	32.8712	1	1	1.88898
614	S06.359A	3.44596	1	1	0.965321
615	S06.359D	0.0161134	1	2	0.080677
616	S06.360A	2.95028	1	1	0.93554
617	S06.361A	1.58601	1	1	0.732171
618	S06.361S	0.0059219	1	2	0.0279822
619	S06.362A	4.13655	1	1	1.05664
620	S06.363A	4.96255	1	1	1.31824
621	S06.364A	13.2422	1	1	1.57149
622	S06.365A	8.33652	1	1	1.44602
623	S06.366A	11.2196	1	1	1.50114
624	S06.367A	33.0579	1	1	1.89832
625	S06.367D	16.5418	1	2	1.64977
626	S06.367S	16.5418	1	1	1.59023
627	S06.368A	31.9178	1	1	1.88328
628	S06.369A	6.09764	1	1	1.14925
629	S06.369D	0.712797	1	1	0.648095
630	S06.370A	2.75272	1	1	0.92208
631	S06.371A	2.36672	1	1	0.832732
632	S06.372A	0.281377	1	2	0.505676
633	S06.373A	9.02282	1	1	1.26081
634	S06.374A	11.0279	1	1	1.54819
635	S06.375A	4.41116	1	1	1.28822
636	S06.376A	12.7365	1	1	1.52799
637	S06.377A	32.8816	1	1	1.88176
638	S06.378A	31.5083	1	1	1.83602
639	S06.379A	6.48967	1	1	1.19294
640	S06.380A	8.78556	1	1	1.29508
641	S06.381A	2.36312	1	1	0.985618
642	S06.382A	18.6096	1	1	1.57135
643	S06.383A	18.3798	1	1	1.63685
644	S06.384A	25.9156	1	1	1.80184
645	S06.385A	16.5418	1	1	1.62787
646	S06.386A	18.2677	1	1	1.62832
647	S06.387A	32.6298	1	1	1.89299
648	S06.388A	34.0197	1	1	1.90907
649	S06.389A	20.5247	1	1	1.67816
650	S06.4X0A	0.789483	1	1	0.472226
651	S06.4X0D	0.030663	1	2	0.121555
652	S06.4X0S	0.0723253	1	1	0.204544
653	S06.4X1A	0.559133	1	1	0.420864
654	S06.4X2A	1.27245	1	1	0.579428
655	S06.4X3A	1.20331	1	1	0.776999
656	S06.4X4A	4.48592	1	1	1.26107
657	S06.4X4D	16.5418	1	2	1.62086
658	S06.4X5A	2.36352	1	1	1.08216
659	S06.4X6A	7.35309	1	1	1.37307
660	S06.4X7A	31.1796	1	1	1.87407
661	S06.4X8A	29.4077	1	1	1.86981
662	S06.4X9A	2.02442	1	1	0.662149
663	S06.5X0A	1.92381	1	1	0.834019
664	S06.5X0D	0.432117	1	1	0.525413
665	S06.5X0S	0.402299	1	1	0.567307
666	S06.5X1A	1.026	1	1	0.66163
667	S06.5X1D	0.865838	1	1	0.806505
668	S06.5X2A	4.27432	1	1	1.0399
669	S06.5X3A	5.31847	1	1	1.28149
670	S06.5X4A	10.9654	1	1	1.49819
671	S06.5X5A	5.94462	1	1	1.33998
672	S06.5X5S	0.0834441	1	2	0.265618
673	S06.5X6A	10.7402	1	1	1.49019
674	S06.5X6D	0.0976628	1	2	0.293609
675	S06.5X7A	35.9712	1	1	1.92665
676	S06.5X7D	24.8128	1	1	1.62795
677	S06.5X7S	22.0558	1	1	1.75259
678	S06.5X8A	34.8995	1	1	1.91173
679	S06.5X9A	3.7792	1	1	0.989317
680	S06.5X9D	0.183221	1	1	0.31025
681	S06.5X9S	1.53358	1	1	0.895646
682	S06.6X0A	1.45535	1	1	0.754449
683	S06.6X0D	1.07313	1	1	0.721638
684	S06.6X1A	0.740482	1	1	0.591878
685	S06.6X1D	0.26196	1	2	0.37052
686	S06.6X2A	2.35014	1	1	0.84689
687	S06.6X3A	4.23273	1	1	1.22057
688	S06.6X4A	10.3846	1	1	1.47217
689	S06.6X5A	5.32304	1	1	1.30798
690	S06.6X6A	8.58271	1	1	1.43209
691	S06.6X6D	0.432117	1	2	0.670085
692	S06.6X6S	16.5418	1	1	1.63473
693	S06.6X7A	32.9449	1	1	1.8853
694	S06.6X7D	24.8128	1	1	1.65686
695	S06.6X7S	16.5418	1	1	1.37213
696	S06.6X8A	31.6807	1	1	1.87321
697	S06.6X9A	3.2066	1	1	0.916637
698	S06.6X9D	0.0329369	1	2	0.100119
699	S06.6X9S	0.0247441	1	2	0.103067
700	S06.810A	0.938055	1	1	0.583009
701	S06.811A	0.0543316	1	1	0.150089
702	S06.812A	0.0583609	1	2	0.147304
703	S06.813A	11.0279	1	1	1.47089
704	S06.814A	16.5418	1	1	1.37979
705	S06.815A	5.51395	1	1	1.31805
706	S06.816A	16.5418	1	1	1.64902
707	S06.817A	30.0761	1	1	1.83182
708	S06.818A	28.9482	1	1	1.79843
709	S06.819A	7.19324	1	1	1.2961
710	S06.820A	1.20158	1	1	0.776948
711	S06.821A	0.0583624	1	1	0.179036
712	S06.822A	0.0962717	1	2	0.218072
713	S06.823A	16.5418	1	1	1.70858
714	S06.824A	11.0279	1	1	1.56561
715	S06.825A	0.0710582	1	2	0.241973
716	S06.826A	0.0185906	1	2	0.0903288
717	S06.827A	29.4077	1	1	1.77238
718	S06.828A	28.3574	1	1	1.84391
719	S06.829A	10.1796	1	1	1.33819
720	S06.890A	2.49904	1	1	0.804026
721	S06.890D	2.08328	1	1	0.895125
722	S06.890S	0.292761	1	1	0.418463
723	S06.891A	1.07371	1	1	0.610927
724	S06.891D	0.302233	1	1	0.409892
725	S06.892A	4.45429	1	1	0.98603
726	S06.893A	2.75814	1	1	1.09618
727	S06.894A	10.6081	1	1	1.50425
728	S06.895A	4.41145	1	1	1.2351
729	S06.895D	0.281377	1	2	0.534255
730	S06.896A	7.01036	1	1	1.40034
731	S06.897A	33.4764	1	1	1.89288
732	S06.897D	16.5418	1	1	1.6961
733	S06.897S	16.5418	1	2	1.65825
734	S06.898A	31.2495	1	1	1.8369
735	S06.899A	4.42499	1	1	0.982076
736	S06.9X0A	0.679673	1	1	0.551444
737	S06.9X0S	0.281377	1	1	0.428149
738	S06.9X1A	0.37007	1	1	0.392445
739	S06.9X1S	2.23769	1	1	0.951892
740	S06.9X2A	4.72779	1	1	0.91973
741	S06.9X3A	3.49119	1	1	1.02035
742	S06.9X4A	15.6729	1	1	1.60563
743	S06.9X5A	9.02282	1	1	1.46457
744	S06.9X6A	14.1787	1	1	1.58985
745	S06.9X7A	33.608	1	1	1.88835
746	S06.9X8A	31.4566	1	1	1.83108
747	S06.9X9A	2.18253	1	1	0.68702
748	S06.9X9S	0.575188	1	1	0.611759
749	S060	0.742009	1	1	0.49714
750	S061	18.3016	1	1	1.56954
751	S0625	5.77999	1	1	1.26336
752	S0635	7.44362	1	1	1.18554
753	S0636	0.133462	1	1	0.362114
754	S064	5.99119	1	1	0.916971
755	S065	7.13502	1	1	1.10926
756	S066	6.42635	1	1	1.05639
757	S0685	10.7	1	1	1.378
758	S0686	0.0270592	1	2	0.124031
759	S069	0.0173083	1	1	0.0702828
760	S07.0XXA	5.46391	1	1	1.09589
761	S07.1XXA	33.1907	1	1	1.77361
762	S08.0XXA	1.63896	1	1	0.624961
763	S08.111A	6.65744	2	1	0.839877
764	S08.112A	4.72624	2	1	0.938679
765	S08.119A	16.5418	2	1	0.915912
766	S08.121A	1.2511	2	1	0.487396
767	S08.122A	1.6566	2	1	0.584457
768	S08.129A	1.61414	2	1	0.779812
769	S08.811A	6.01522	2	1	0.952459
770	S08.812A	0.0446937	2	1	0.136014
771	S08.89XA	24.8128	2	1	1.71153
772	S08.89XD	0.083444	2	1	0.178878
773	S080	0.282942	1	2	0.42936
774	S081	0.139748	2	1	0.234963
775	S09.0XXA	4.36286	1	1	0.896723
776	S09.10XA	1.22684	1	1	0.482279
777	S09.11XA	0.0380037	1	1	0.101552
778	S09.12XA	0.880493	1	1	0.528757
779	S09.19XA	0.0423336	1	1	0.106861
780	S09.20XA	3.00791	2	1	0.686472
781	S09.21XA	0.939015	2	1	0.472182
782	S09.22XA	1.00277	2	1	0.50189
783	S09.301A	3.30901	2	1	0.727414
784	S09.302A	2.20558	2	1	0.73745
785	S09.309A	3.67596	2	1	0.96105
786	S09.311A	0.0597619	2	1	0.15723
787	S09.312A	0.0306629	2	2	0.123602
788	S09.319A	0.0505841	2	2	0.145717
789	S09.391A	2.81631	2	1	0.794049
790	S09.392A	3.8922	2	1	0.876192
791	S09.399A	2.20661	2	1	0.713224
792	S09.8XXA	0.946226	2	1	0.549606
793	S09.8XXD	0.0329368	2	2	0.135981
794	S09.8XXS	0.183221	2	1	0.30316
795	S09.90XA	0.862508	2	1	0.574784
796	S09.90XD	0.128148	2	1	0.261779
797	S09.91XA	2.42049	2	1	0.658651
798	S09.92XA	1.64409	2	1	0.625515
799	S09.93XA	1.04486	2	1	0.538053
800	S09.93XD	1.26294	2	2	0.827518
801	S090	11.0279	1	1	1.11894
802	S092	0.137646	2	2	0.260274
803	S098	0.149364	2	2	0.336774
804	S099	4.13546	2	1	1.09453
805	S10.0XXA	3.00774	1	1	0.75061
806	S10.10XA	0.0943297	1	1	0.21824
807	S10.11XA	0.386638	1	1	0.36695
808	S10.14XA	0.61782	1	2	0.523079
809	S10.15XA	0.0063608	1	2	0.0380907
810	S10.80XA	1.28683	1	1	0.551131
811	S10.81XA	0.824321	1	1	0.447237
812	S10.83XA	1.6278	1	1	0.596946
813	S10.83XD	0.0543341	1	1	0.120303
814	S10.83XS	0.119305	1	2	0.228361
815	S10.84XA	0.432117	1	2	0.48972
816	S10.85XA	0.0207916	1	1	0.0763163
817	S10.90XA	0.948923	1	1	0.434335
818	S10.91XA	0.719765	1	1	0.419693
819	S10.93XA	1.36345	1	1	0.567801
820	S10.93XD	0.0265784	1	2	0.0839384
821	S10.95XA	0.119305	1	1	0.197763
822	S10.96XA	0.765629	1	1	0.628698
823	S100	3.8922	1	1	0.833221
824	S101	0.0306648	1	1	0.12428
825	S11.011A	2.86142	1	1	0.884403
826	S11.012A	0.0229297	1	1	0.0984359
827	S11.013A	0.0648008	1	1	0.192031
828	S11.014A	0.0247454	1	1	0.09626
829	S11.019A	16.5418	1	1	1.41208
830	S11.021A	2.82935	1	1	0.857009
831	S11.022A	0.021449	1	1	0.0952236
832	S11.023A	4.15365	1	1	1.05646
833	S11.024A	0.0408198	1	1	0.14203
834	S11.029A	0.137646	1	2	0.300638
835	S11.031A	0.0275654	1	1	0.107024
836	S11.039A	0.033701	1	2	0.110163
837	S11.10XA	0.028548	1	2	0.132475
838	S11.11XA	1.57599	1	1	0.736386
839	S11.12XA	0.170577	1	1	0.24663
840	S11.13XA	0.0187818	1	1	0.0824284
841	S11.14XA	0.134982	1	1	0.239017
842	S11.20XA	3.48375	1	1	0.565446
843	S11.21XA	2.10763	1	1	0.807055
844	S11.22XA	3.01145	1	1	0.61571
845	S11.23XA	2.2061	1	1	0.624699
846	S11.24XA	0.0262986	1	1	0.0884738
847	S11.80XA	1.29037	1	1	0.528304
848	S11.80XD	0.0380007	1	2	0.0978982
849	S11.81XA	0.580578	1	1	0.362532
850	S11.81XD	0.0380006	1	1	0.0997162
851	S11.82XA	0.864591	1	1	0.473405
852	S11.83XA	0.558975	1	1	0.375187
853	S11.84XA	0.65564	1	1	0.494501
854	S11.85XA	0.18322	1	1	0.241701
855	S11.89XA	2.0775	1	1	0.616419
856	S11.90XA	1.15506	1	1	0.426417
857	S11.91XA	1.1101	1	1	0.460543
858	S11.92XA	0.770325	1	1	0.488822
859	S11.93XA	1.27273	1	1	0.491412
860	S11.94XA	1.98724	1	1	0.603488
861	S11.95XA	0.324633	1	1	0.418062
862	S1100	4.13546	1	1	0.928916
863	S1101	0.01859	1	1	0.0901061
864	S1120	0.387073	1	1	0.515784
865	S1190	0.0338988	1	1	0.0907285
866	S12.000A	3.56463	1	1	0.963866
867	S12.000B	2.75697	1	1	0.997
868	S12.000D	0.0306643	1	1	0.0962775
869	S12.001A	2.31375	1	1	0.847913
870	S12.001B	16.5418	1	1	1.29371
871	S12.01XA	1.48682	1	1	0.769836
872	S12.01XB	0.243885	1	1	0.384546
873	S12.01XD	1.26294	1	1	0.796902
874	S12.02XA	6.32777	1	1	1.10108
875	S12.02XB	0.0214476	1	2	0.0795998
876	S12.030A	3.39656	1	1	0.985574
877	S12.030B	26.4669	1	1	1.79081
878	S12.031A	2.15616	1	1	0.863901
879	S12.031D	1.35655	1	1	0.82157
880	S12.040A	2.8174	1	1	0.856083
881	S12.040B	18.905	1	1	1.48243
882	S12.040K	16.5418	1	1	1.3274
883	S12.041A	1.81388	1	1	0.745894
884	S12.041B	0.227055	1	1	0.33728
885	S12.041D	2.23769	1	3	0.905126
886	S12.090A	3.12459	1	1	0.90414
887	S12.090B	4.50167	1	1	1.09386
888	S12.090D	1.32987	1	1	0.78343
889	S12.091A	1.93774	1	1	0.820609
890	S12.091B	0.0776855	1	2	0.225861
891	S12.100A	2.49716	1	1	0.851993
892	S12.100B	13.2335	1	1	1.54789
893	S12.100D	0.281377	1	2	0.501271
894	S12.100K	2.40354	1	1	1.00842
895	S12.101A	1.92273	1	1	0.810023
896	S12.101B	0.0353782	1	2	0.143526
897	S12.110A	3.19162	1	1	0.955516
898	S12.110B	1.59324	1	1	0.883651
899	S12.110D	1.09466	1	1	0.724359
900	S12.110K	2.23769	1	1	0.966876
901	S12.111A	4.64825	1	1	1.06645
902	S12.111B	16.5418	1	1	1.74649
903	S12.112A	1.89299	1	1	0.856641
904	S12.112B	1.68539	1	1	0.856194
905	S12.112D	0.0470938	1	2	0.122143
906	S12.120A	2.75735	1	1	0.890361
907	S12.120B	6.76371	1	1	1.0063
908	S12.120D	2.23769	1	1	0.923929
909	S12.121A	1.83005	1	1	0.833583
910	S12.121B	0.050584	1	2	0.193813
911	S12.121D	1.17579	1	2	0.778088
912	S12.130A	0.612541	1	1	0.553986
913	S12.130K	0.348694	1	1	0.533937
914	S12.131A	0.464145	1	1	0.48916
915	S12.131B	0.0408186	1	2	0.151944
916	S12.14XA	2.87141	1	1	0.884631
917	S12.150A	1.93722	1	1	0.780042
918	S12.151A	0.344189	1	1	0.459852
919	S12.190A	2.16424	1	1	0.792627
920	S12.190B	3.01101	1	1	1.03319
921	S12.191A	2.10462	1	1	0.797388
922	S12.191B	13.2335	1	1	1.29688
923	S12.200A	2.07758	1	1	0.787941
924	S12.200B	8.27092	1	1	1.25813
925	S12.200D	1.26294	1	1	0.798801
926	S12.201A	2.04029	1	1	0.736867
927	S12.201B	16.5418	1	1	1.44645
928	S12.230A	6.61674	1	1	1.03466
929	S12.231A	0.664086	1	1	0.563518
930	S12.24XA	1.28543	1	1	0.921976
931	S12.250A	4.41116	1	1	1.06385
932	S12.250B	16.5418	1	1	1.61904
933	S12.251A	0.119306	1	1	0.284028
934	S12.290A	2.71047	1	1	0.831649
935	S12.290B	1.74125	1	1	0.69456
936	S12.291A	1.872	1	1	0.766571
937	S12.291B	5.51395	1	1	1.05403
938	S12.300A	2.62811	1	1	0.825743
939	S12.300B	4.72624	1	1	1.13275
940	S12.301A	3.20031	1	1	0.829763
941	S12.301B	0.0626866	1	2	0.174449
942	S12.301D	0.822376	1	1	0.664095
943	S12.330A	0.0222443	1	1	0.0914568
944	S12.331A	5.51395	1	1	1.10423
945	S12.34XA	0.981623	1	1	0.868826
946	S12.350A	3.68998	1	1	0.988845
947	S12.351A	0.773372	1	1	0.579262
948	S12.390A	2.67224	1	1	0.808362
949	S12.390B	0.0199692	1	1	0.0748756
950	S12.391A	1.59678	1	1	0.704878
951	S12.391B	4.75065	1	1	0.81769
952	S12.391D	0.883329	1	1	0.689399
953	S12.400A	2.5342	1	1	0.793265
954	S12.400B	9.45509	1	1	1.29411
955	S12.400D	0.124133	1	1	0.229601
956	S12.401A	1.13865	1	1	0.605751
957	S12.401B	9.22527	1	1	0.943475
958	S12.430A	1.48064	1	1	0.712921
959	S12.431A	4.48319	1	1	1.06352
960	S12.44XA	0.0415554	1	1	0.124629
961	S12.450A	2.85102	1	1	0.748187
962	S12.451A	0.0543349	1	2	0.133407
963	S12.490A	1.83223	1	1	0.728808
964	S12.490B	2.75697	1	1	0.972013
965	S12.491A	1.89815	1	1	0.721642
966	S12.491B	11.0279	1	1	1.17996
967	S12.491D	0.128147	1	2	0.264158
968	S12.500A	1.93301	1	1	0.722742
969	S12.500B	1.5038	1	1	0.750048
970	S12.500D	0.0750072	1	2	0.179467
971	S12.501A	1.11585	1	1	0.592843
972	S12.501B	1.01912	1	2	0.76382
973	S12.501D	0.26196	1	2	0.36417
974	S12.530A	1.06722	1	1	0.643329
975	S12.531A	0.361617	1	1	0.441189
976	S12.54XA	0.266676	1	1	0.356563
977	S12.550A	0.78925	1	1	0.510218
978	S12.551A	1.74125	1	1	0.675598
979	S12.590A	1.88429	1	1	0.714833
980	S12.590B	1.74125	1	1	0.891887
981	S12.590D	1.01912	1	1	0.701681
982	S12.591A	1.51654	1	1	0.675184
983	S12.591B	5.51395	1	1	1.10734
984	S12.600A	1.95944	1	1	0.715452
985	S12.600B	0.0185914	1	1	0.0763421
986	S12.600D	0.723081	1	1	0.527759
987	S12.600S	1.35655	1	2	0.795705
988	S12.601A	1.55064	1	1	0.65812
989	S12.601B	4.75144	1	1	0.94407
990	S12.601D	0.147672	1	2	0.300453
991	S12.630A	4.15887	1	1	0.907518
992	S12.630B	0.099668	1	1	0.200124
993	S12.631A	0.34594	1	1	0.42482
994	S12.64XA	0.0448592	1	1	0.122076
995	S12.650A	1.62263	1	1	0.588262
996	S12.651A	1.02487	1	1	0.596507
997	S12.690A	1.76963	1	1	0.669101
998	S12.690B	4.56535	1	1	1.06418
999	S12.691A	1.66354	1	1	0.673934
1000	S12.691B	9.02282	1	1	1.15059
1001	S12.691D	0.26196	1	2	0.371015
1002	S12.691S	0.0353781	1	2	0.108234
1003	S12.8XXA	2.83121	1	1	0.762861
1004	S12.9XXA	2.52641	1	1	0.805339
1005	S12000	3.30837	1	1	0.868974
1006	S12100	3.28475	1	1	0.849025
1007	S12200	2.41036	1	1	0.802491
1008	S12210	2.10675	1	1	0.709612
1009	S12211	0.158806	1	1	0.356445
1010	S12700	0.0185899	1	2	0.0826738
1011	S12800	8.27092	1	1	1.07585
1012	S12900	13.7849	1	1	1.38948
1013	S13.0XXA	1.20522	1	1	0.588141
1014	S13.100A	1.14165	1	1	0.660573
1015	S13.101A	4.13693	1	1	0.871695
1016	S13.110A	3.58817	1	1	1.01818
1017	S13.111A	12.1235	1	1	1.45615
1018	S13.120A	3.40581	1	1	0.903667
1019	S13.121A	7.80348	1	1	1.21663
1020	S13.130A	0.932621	1	1	0.537279
1021	S13.131A	1.5585	1	1	0.693094
1022	S13.140A	0.975408	1	1	0.662927
1023	S13.141A	1.92332	1	1	0.72307
1024	S13.150A	2.6744	1	1	0.785366
1025	S13.151A	1.45451	1	1	0.65155
1026	S13.160A	1.91444	1	1	0.699758
1027	S13.160S	2.08328	1	1	0.912163
1028	S13.161A	1.97782	1	1	0.651235
1029	S13.170A	1.68117	1	1	0.711762
1030	S13.171A	1.83258	1	1	0.651952
1031	S13.180A	0.907543	1	1	0.694536
1032	S13.181A	0.827092	1	1	0.541702
1033	S13.20XA	0.23909	1	1	0.421438
1034	S13.29XA	9.74087	1	1	1.22682
1035	S13.4XXA	0.733385	1	1	0.464797
1036	S13.4XXD	0.0230379	1	1	0.0737532
1037	S13.5XXA	0.0470881	1	1	0.133032
1038	S13.8XXA	0.104161	1	1	0.202745
1039	S13.9XXA	0.0432562	1	1	0.118727
1040	S131	11.452	1	1	1.22315
1041	S1348	3.78099	1	1	0.750939
1042	S136	0.791801	1	1	0.641007
1043	S14.0XXA	1.96092	1	1	0.73854
1044	S14.101A	5.98929	1	1	1.13969
1045	S14.102A	4.07876	1	1	1.03641
1046	S14.103A	3.01007	1	1	0.834051
1047	S14.104A	2.27458	1	1	0.767488
1048	S14.105A	1.44995	1	1	0.654595
1049	S14.106A	1.89759	1	1	0.72274
1050	S14.107A	4.2116	1	1	0.924678
1051	S14.108A	0.225978	1	1	0.400491
1052	S14.109A	3.59786	1	1	0.794337
1053	S14.109S	0.324633	1	1	0.42929
1054	S14.111A	19.2988	1	1	1.64758
1055	S14.112A	22.7074	1	1	1.73723
1056	S14.113A	13.5569	1	1	1.50782
1057	S14.114A	8.05302	1	1	1.26018
1058	S14.115A	6.79172	1	1	1.20428
1059	S14.116A	5.47496	1	1	1.10883
1060	S14.116S	0.054334	1	2	0.177647
1061	S14.117A	5.29585	1	1	1.10422
1062	S14.118A	21.3216	1	1	1.52814
1063	S14.119A	13.2485	1	1	1.36357
1064	S14.121A	6.10565	1	1	1.19061
1065	S14.122A	3.44699	1	1	0.939581
1066	S14.123A	1.12277	1	1	0.675575
1067	S14.124A	1.30411	1	1	0.672271
1068	S14.125A	1.41439	1	1	0.695813
1069	S14.126A	1.3276	1	1	0.683401
1070	S14.127A	2.10338	1	1	0.781046
1071	S14.128A	0.221727	1	1	0.363676
1072	S14.129A	3.54098	1	1	0.884073
1073	S14.129S	0.243884	1	1	0.505636
1074	S14.131A	16.5418	1	1	1.48865
1075	S14.132A	0.111358	1	1	0.273479
1076	S14.133A	2.40977	1	1	0.97076
1077	S14.134A	1.66434	1	1	0.868274
1078	S14.135A	3.31648	1	1	0.911405
1079	S14.136A	0.666757	1	1	0.640733
1080	S14.137A	0.464145	1	1	0.470587
1081	S14.138A	0.0230362	1	2	0.075569
1082	S14.139A	0.535498	1	2	0.529746
1083	S14.141A	0.0199674	1	2	0.0757489
1084	S14.142A	0.111073	1	1	0.204872
1085	S14.143A	2.099	1	1	0.76676
1086	S14.144A	0.211388	1	1	0.296599
1087	S14.145A	0.019968	1	2	0.0710086
1088	S14.146A	0.202604	1	1	0.311194
1089	S14.147A	0.0247453	1	1	0.100263
1090	S14.149A	0.861967	1	1	0.605747
1091	S14.151A	6.78645	1	1	1.20619
1092	S14.152A	5.66537	1	1	1.14026
1093	S14.153A	1.73059	1	1	0.736752
1094	S14.154A	3.01099	1	1	0.913766
1095	S14.155A	2.78362	1	1	0.832357
1096	S14.156A	4.25735	1	1	0.941018
1097	S14.157A	3.15349	1	1	0.826687
1098	S14.157D	0.374539	1	2	0.428049
1099	S14.158A	0.712797	1	2	0.849557
1100	S14.159A	4.81499	1	1	1.04116
1101	S14.2XXA	0.235116	1	1	0.343673
1102	S14.3XXA	0.382243	1	1	0.384777
1103	S14.4XXA	0.402299	1	2	0.595724
1104	S14.5XXA	0.0411684	1	1	0.11093
1105	S14.8XXA	2.83704	1	1	0.807205
1106	S14.9XXA	0.167065	1	1	0.252198
1107	S140	4.32191	1	1	0.87606
1108	S1410	17.2936	1	1	1.49705
1109	S1411	0.402299	1	1	0.464267
1110	S1418	1.369	1	1	0.687661
1111	S1419	0.0474981	1	2	0.171369
1112	S1428	0.0121057	1	2	0.0464853
1113	S1430	0.0332775	1	2	0.10422
1114	S1438	0.0296089	1	1	0.114268
1115	S1448	0.348694	1	1	0.496367
1116	S1468	0.0830769	1	1	0.193014
1117	S15.001A	5.0994	1	1	1.11022
1118	S15.002A	5.17649	1	1	1.04533
1119	S15.009A	3.74518	1	1	0.959445
1120	S15.011A	1.71863	1	1	0.642728
1121	S15.011D	0.0583608	1	2	0.205042
1122	S15.012A	3.67903	1	1	0.889202
1123	S15.012D	0.0583607	1	2	0.205041
1124	S15.019A	3.42245	1	1	0.90779
1125	S15.021A	10.8113	1	1	1.34166
1126	S15.022A	7.96665	1	1	1.24283
1127	S15.029A	7.87707	1	1	1.28957
1128	S15.091A	4.84372	1	1	1.11862
1129	S15.092A	5.65369	1	1	1.14771
1130	S15.099A	5.37726	1	1	1.14043
1131	S15.101A	3.02719	1	1	0.813512
1132	S15.102A	4.16428	1	1	0.955706
1133	S15.102D	0.498546	1	1	0.522276
1134	S15.109A	1.88509	1	1	0.689442
1135	S15.111A	3.00852	1	1	0.83116
1136	S15.112A	2.81612	1	1	0.849051
1137	S15.119A	2.20558	1	1	0.753025
1138	S15.121A	10.3387	1	1	1.29321
1139	S15.122A	9.26343	1	1	1.20577
1140	S15.129A	7.94008	1	1	1.28021
1141	S15.191A	3.88401	1	1	0.94124
1142	S15.191S	0.179983	1	2	0.339505
1143	S15.192A	3.48785	1	1	0.909109
1144	S15.199A	3.81993	1	1	1.00871
1145	S15.201A	0.0230388	1	1	0.0734496
1146	S15.202A	0.120529	1	1	0.268269
1147	S15.209A	0.0275655	1	1	0.0841551
1148	S15.211A	0.922182	1	1	0.615418
1149	S15.212A	0.0787771	1	1	0.162818
1150	S15.219A	3.19742	1	1	0.781701
1151	S15.221A	2.25708	1	1	0.750588
1152	S15.222A	0.925998	1	1	0.491258
1153	S15.229A	5.8383	1	1	0.985334
1154	S15.291A	0.0458041	1	1	0.126072
1155	S15.292A	0.081982	1	2	0.236115
1156	S15.299A	0.0361989	1	1	0.0788178
1157	S15.301A	2.75697	1	1	0.956426
1158	S15.302A	1.65418	1	1	0.637548
1159	S15.309A	12.4064	1	1	1.34811
1160	S15.311A	0.714878	1	1	0.477456
1161	S15.312A	2.31933	1	1	0.793488
1162	S15.319A	0.0600397	1	1	0.138853
1163	S15.321A	5.87159	1	1	1.10638
1164	S15.322A	4.27224	1	1	0.954681
1165	S15.329A	6.61674	1	1	1.1286
1166	S15.391A	3.15083	1	1	0.966919
1167	S15.392A	1.76163	1	1	0.864343
1168	S15.399A	0.0423332	1	2	0.145753
1169	S15.8XXA	1.5993	1	1	0.632025
1170	S15.9XXA	3.60898	1	1	0.813076
1171	S150	7.75726	1	1	1.21969
1172	S151	5.51395	1	1	1.1034
1173	S152	0.102336	1	1	0.235558
1174	S153	0.0400184	1	1	0.143142
1175	S16.1XXA	0.114304	1	1	0.213353
1176	S16.1XXD	0.0161133	1	2	0.0781605
1177	S16.2XXA	0.134064	1	1	0.210952
1178	S16.8XXA	1.83214	2	1	0.636351
1179	S16.9XXA	0.0565776	2	1	0.145378
1180	S17.0XXA	6.6528	1	1	1.21215
1181	S17.8XXA	0.0306628	1	2	0.083613
1182	S170	0.0185898	1	1	0.0901053
1183	S19.80XA	0.106581	2	1	0.202956
1184	S19.81XA	0.668886	2	1	0.456177
1185	S19.82XA	0.030801	2	1	0.100636
1186	S19.83XA	0.0683506	2	1	0.154195
1187	S19.84XA	8.70617	2	1	1.10969
1188	S19.85XA	3.1533	2	1	0.846715
1189	S19.89XA	1.80354	2	1	0.667257
1190	S19.9XXA	0.161515	2	1	0.251725
1191	S198	0.0482017	2	1	0.136952
1192	S20.00XA	1.76553	3	1	0.668004
1193	S20.01XA	1.60782	3	1	0.697524
1194	S20.02XA	1.55848	3	1	0.657798
1195	S20.101A	0.165536	3	2	0.288286
1196	S20.102A	0.18322	3	2	0.310756
1197	S20.109A	0.639601	3	1	0.620634
1198	S20.111A	0.62422	3	1	0.487955
1199	S20.112A	1.23478	3	1	0.537928
1200	S20.119A	0.031419	3	1	0.0971815
1201	S20.20XA	1.08096	3	1	0.565067
1202	S20.211A	1.45234	3	1	0.639133
1203	S20.212A	0.948912	3	1	0.559156
1204	S20.212D	0.822375	3	1	0.64944
1205	S20.212S	1.26294	3	1	0.742418
1206	S20.219A	1.00332	3	1	0.554377
1207	S20.219D	1.35655	3	1	0.80678
1208	S20.221A	1.58104	3	1	0.681821
1209	S20.222A	1.48298	3	1	0.63204
1210	S20.229A	0.89436	3	1	0.520185
1211	S20.229S	1.09466	3	1	0.749015
1212	S20.301A	0.108732	3	1	0.248406
1213	S20.302A	0.304	3	1	0.402678
1214	S20.309A	0.158808	3	1	0.289204
1215	S20.311A	1.13307	3	1	0.527143
1216	S20.311S	0.0470937	3	2	0.15985
1217	S20.312A	0.959606	3	1	0.499223
1218	S20.312D	0.504757	3	1	0.458066
1219	S20.319A	1.11192	3	1	0.527403
1220	S20.349A	0.0893888	3	1	0.189436
1221	S20.351A	0.133578	3	2	0.259991
1222	S20.352A	0.0393022	3	1	0.0828237
1223	S20.369A	0.128147	3	2	0.262523
1224	S20.372A	0.024744	3	2	0.0713337
1225	S20.379A	1.26294	3	2	0.742326
1226	S20.401A	4.72624	3	1	0.71239
1227	S20.402A	0.0199679	3	2	0.070388
1228	S20.409A	0.0372569	3	1	0.115776
1229	S20.411A	0.972133	3	1	0.511172
1230	S20.411S	0.18322	3	1	0.282754
1231	S20.412A	1.14471	3	1	0.522492
1232	S20.412S	0.0776854	3	2	0.255842
1233	S20.419A	0.898153	3	1	0.488964
1234	S20.421A	0.035378	3	2	0.10824
1235	S20.451A	0.0214211	3	1	0.073114
1236	S20.452A	0.0353779	3	2	0.132149
1237	S20.459A	16.5418	3	1	1.64363
1238	S20.479A	0.0285479	3	1	0.080602
1239	S20.90XA	1.78074	3	1	0.638933
1240	S20.91XA	1.03687	3	1	0.510564
1241	S20.95XA	0.0395417	3	2	0.142604
1242	S20.97XA	0.288117	3	2	0.372241
1243	S201	1.80569	3	1	0.909481
1244	S202	4.13546	3	1	0.787593
1245	S203	0.0723252	3	2	0.173971
1246	S204	11.0279	3	1	1.08023
1247	S208	0.0543361	3	1	0.145144
1248	S21.001A	0.0275658	3	1	0.0949021
1249	S21.002A	0.0822953	3	1	0.199388
1250	S21.011A	0.638598	3	1	0.366301
1251	S21.012A	0.52844	3	1	0.345626
1252	S21.019A	0.0396141	3	1	0.0905231
1253	S21.021A	6.6637	3	1	0.781649
1254	S21.022A	0.0185905	3	1	0.0678745
1255	S21.031A	2.22123	3	1	0.542894
1256	S21.032A	0.0548134	3	1	0.121531
1257	S21.041A	5.52331	3	1	0.618922
1258	S21.042A	0.0383369	3	1	0.116477
1259	S21.101A	0.983669	3	1	0.533209
1260	S21.102A	0.36042	3	1	0.370972
1261	S21.109A	1.6206	3	1	0.533418
1262	S21.109S	0.196801	3	2	0.428688
1263	S21.111A	0.992024	3	1	0.384554
1264	S21.111D	0.0380005	3	2	0.0995668
1265	S21.112A	0.270951	3	1	0.251906
1266	S21.119A	0.496175	3	1	0.316747
1267	S21.121A	0.692005	3	1	0.44541
1268	S21.121D	0.0380004	3	1	0.0987906
1269	S21.122A	0.691637	3	1	0.474735
1270	S21.129A	3.55307	3	1	0.628992
1271	S21.131A	0.503679	3	1	0.364704
1272	S21.132A	0.498074	3	1	0.328055
1273	S21.139A	1.38345	3	1	0.471554
1274	S21.141A	1.27363	3	1	0.585089
1275	S21.142A	0.402846	3	1	0.407107
1276	S21.149A	0.0225381	3	1	0.0797428
1277	S21.152A	0.227055	3	1	0.300214
1278	S21.159A	0.045471	3	1	0.099168
1279	S21.201A	1.35225	3	1	0.58275
1280	S21.202A	2.48325	3	1	0.65912
1281	S21.209A	1.94862	3	1	0.562593
1282	S21.211A	0.551673	3	1	0.299053
1283	S21.212A	0.0934947	3	1	0.152435
1284	S21.212D	0.0230361	3	2	0.0629015
1285	S21.219A	0.605679	3	1	0.337013
1286	S21.219D	0.137646	3	2	0.217122
1287	S21.221A	3.1535	3	1	0.693873
1288	S21.222A	0.0224038	3	1	0.0806545
1289	S21.229A	0.069962	3	1	0.152639
1290	S21.231A	0.538599	3	1	0.343842
1291	S21.232A	0.807571	3	1	0.358486
1292	S21.239A	1.20422	3	1	0.427044
1293	S21.241A	0.0194827	3	1	0.0731569
1294	S21.242A	0.023633	3	1	0.0850016
1295	S21.249A	0.0862093	3	1	0.197174
1296	S21.251A	0.0834439	3	2	0.168613
1297	S21.301A	6.36318	3	1	0.884657
1298	S21.302A	4.38974	3	1	0.843788
1299	S21.309A	2.85261	3	1	0.810552
1300	S21.311A	3.77171	3	1	0.61467
1301	S21.312A	1.22634	3	1	0.384077
1302	S21.319A	5.51395	3	1	0.949261
1303	S21.321A	2.82278	3	1	0.709029
1304	S21.322A	2.11172	3	1	0.687011
1305	S21.329A	8.29964	3	1	1.36855
1306	S21.331A	3.8411	3	1	0.694326
1307	S21.332A	1.99189	3	1	0.579586
1308	S21.339A	7.36775	3	1	1.1693
1309	S21.341A	5.04908	3	1	0.840461
1310	S21.342A	2.92042	3	1	0.739526
1311	S21.342D	0.0173074	3	2	0.0683276
1312	S21.349A	4.41116	3	1	1.12615
1313	S21.401A	4.88728	3	1	0.877199
1314	S21.402A	0.0584748	3	1	0.15109
1315	S21.409A	8.29003	3	1	0.841193
1316	S21.411A	1.69732	3	1	0.432195
1317	S21.412A	1.00387	3	1	0.337731
1318	S21.419A	0.790253	3	1	0.383549
1319	S21.421A	2.87912	3	1	0.702237
1320	S21.422A	0.0254977	3	1	0.0688644
1321	S21.429A	0.0342157	3	1	0.108944
1322	S21.431A	2.70071	3	1	0.529568
1323	S21.432A	2.71576	3	1	0.476561
1324	S21.439A	3.00761	3	1	0.710534
1325	S21.441A	0.0232948	3	1	0.0837952
1326	S21.442A	3.1016	3	1	0.681078
1327	S21.449A	8.27092	3	1	1.42707
1328	S21.449S	0.170577	3	1	0.314719
1329	S21.90XA	3.67676	3	1	0.69891
1330	S21.91XA	1.22071	3	1	0.452403
1331	S21.92XA	2.75765	3	1	0.726693
1332	S21.93XA	1.31053	3	1	0.455385
1333	S21.94XA	0.0295683	3	1	0.0994427
1334	S21.95XA	0.0353797	3	1	0.103389
1335	S2100	0.0648338	3	1	0.0973154
1336	S2110	0.0247972	3	1	0.0650201
1337	S2120	1.84357	3	1	0.381517
1338	S2121	0.26196	3	2	0.373627
1339	S2190	0.895599	3	1	0.303314
1340	S2191	0.041669	3	1	0.104769
1341	S22.000A	0.905036	3	1	0.604731
1342	S22.000B	0.522852	3	2	0.491068
1343	S22.001A	0.208828	3	1	0.37148
1344	S22.001B	0.021669	3	2	0.0933616
1345	S22.002A	2.58456	3	1	0.961357
1346	S22.002B	16.5418	3	1	1.70058
1347	S22.008A	1.33046	3	1	0.662138
1348	S22.008B	11.0279	3	1	1.38362
1349	S22.009A	2.08316	3	1	0.73837
1350	S22.009B	16.5418	3	1	1.26246
1351	S22.009D	0.323683	3	1	0.364857
1352	S22.010A	1.29392	3	1	0.672352
1353	S22.010B	0.374539	3	2	0.594573
1354	S22.010D	0.302232	3	2	0.416202
1355	S22.011A	1.41053	3	1	0.687176
1356	S22.011B	16.5418	3	1	1.48149
1357	S22.012A	4.13981	3	1	0.782953
1358	S22.018A	2.37457	3	1	0.755319
1359	S22.018B	0.0307457	3	1	0.106691
1360	S22.018D	2.23769	3	1	0.898223
1361	S22.019A	1.97645	3	1	0.733114
1362	S22.019B	2.20558	3	1	0.603576
1363	S22.020A	0.997904	3	1	0.631642
1364	S22.020B	0.26196	3	2	0.395234
1365	S22.021A	0.869024	3	1	0.623063
1366	S22.021B	16.5418	3	1	1.49068
1367	S22.022A	7.35193	3	1	1.0576
1368	S22.022B	16.5418	3	1	1.65734
1369	S22.028A	2.36357	3	1	0.764613
1370	S22.028B	4.72754	3	1	1.07824
1371	S22.028D	0.26196	3	2	0.374335
1372	S22.028G	0.0112703	3	2	0.0466845
1373	S22.029A	1.33217	3	1	0.698733
1374	S22.029B	0.0285509	3	1	0.114719
1375	S22.030A	0.94618	3	1	0.553181
1376	S22.030B	0.227055	3	2	0.434233
1377	S22.030D	0.883329	3	1	0.665853
1378	S22.031A	1.2485	3	1	0.646734
1379	S22.031B	0.0161137	3	1	0.0644651
1380	S22.032A	2.72572	3	1	0.85264
1381	S22.032B	16.5418	3	1	1.65734
1382	S22.038A	2.02937	3	1	0.72428
1383	S22.038B	3.97004	3	1	1.03708
1384	S22.039A	1.84175	3	1	0.69276
1385	S22.039B	0.0418543	3	1	0.148993
1386	S22.040A	0.740239	3	1	0.544431
1387	S22.040B	0.227055	3	2	0.434233
1388	S22.040D	0.698445	3	1	0.566663
1389	S22.041A	1.06943	3	1	0.597351
1390	S22.041B	0.0380019	3	2	0.112878
1391	S22.042A	3.30941	3	1	0.976133
1392	S22.042B	16.5418	3	1	1.66735
1393	S22.048A	2.12337	3	1	0.716867
1394	S22.048B	3.03665	3	1	0.698323
1395	S22.048D	0.712797	3	1	0.654008
1396	S22.049A	1.60641	3	1	0.669783
1397	S22.049B	0.0423335	3	1	0.126319
1398	S22.049D	0.697275	3	1	0.476049
1399	S22.050A	0.806317	3	1	0.548458
1400	S22.050B	0.158807	3	1	0.271099
1401	S22.050D	0.418865	3	2	0.484641
1402	S22.051A	1.67894	3	1	0.691583
1403	S22.051S	2.40354	3	1	0.981566
1404	S22.052A	2.27879	3	1	0.718565
1405	S22.052B	0.822375	3	1	0.90048
1406	S22.058A	1.77377	3	1	0.689051
1407	S22.058B	1.22532	3	1	0.582431
1408	S22.059A	1.46154	3	1	0.669914
1409	S22.059B	0.366113	3	1	0.406032
1410	S22.060A	1.00671	3	1	0.58896
1411	S22.060B	0.0698126	3	2	0.17949
1412	S22.060D	0.23052	3	2	0.421342
1413	S22.061A	1.72905	3	1	0.69391
1414	S22.061B	0.027707	3	2	0.103914
1415	S22.061S	2.40354	3	1	0.981566
1416	S22.062A	2.43628	3	1	0.766051
1417	S22.062B	16.5418	3	1	1.37692
1418	S22.068A	1.82976	3	1	0.739684
1419	S22.068B	2.07007	3	1	0.741955
1420	S22.069A	1.37265	3	1	0.702609
1421	S22.069B	0.0436442	3	1	0.126927
1422	S22.069D	0.535498	3	2	0.573894
1423	S22.069S	0.013003	3	1	0.0492328
1424	S22.070A	1.1593	3	1	0.617624
1425	S22.070B	0.0144846	3	1	0.0592817
1426	S22.070D	0.325464	3	2	0.435534
1427	S22.071A	1.44804	3	1	0.702654
1428	S22.071B	0.548482	3	1	0.553242
1429	S22.071D	0.128147	3	2	0.251414
1430	S22.072A	2.58415	3	1	0.784765
1431	S22.072B	11.0279	3	1	0.907982
1432	S22.078A	1.9188	3	1	0.740443
1433	S22.078B	1.03557	3	1	0.630797
1434	S22.078D	0.281376	3	1	0.385201
1435	S22.078S	1.26294	3	2	0.807506
1436	S22.079A	1.55731	3	1	0.705855
1437	S22.079B	2.245	3	1	0.694082
1438	S22.080A	0.861485	3	1	0.599433
1439	S22.080B	0.966785	3	1	0.704416
1440	S22.080D	0.822376	3	1	0.61839
1441	S22.080K	0.158806	3	2	0.386506
1442	S22.080S	0.71462	3	1	0.696109
1443	S22.081A	0.984174	3	1	0.611126
1444	S22.081B	0.225585	3	1	0.375664
1445	S22.082A	0.76658	3	1	0.530358
1446	S22.082B	0.0353789	3	2	0.112258
1447	S22.082D	0.0470936	3	2	0.136203
1448	S22.088A	1.63171	3	1	0.694814
1449	S22.088B	1.78831	3	1	0.705391
1450	S22.089A	1.10397	3	1	0.654031
1451	S22.089B	4.41116	3	1	1.08632
1452	S22.089D	0.261961	3	2	0.371676
1453	S22.20XA	1.79163	3	1	0.715561
1454	S22.20XB	1.45475	3	1	0.676878
1455	S22.20XD	1.21506	3	1	0.63843
1456	S22.21XA	1.80503	3	1	0.705193
1457	S22.21XB	0.0363279	3	1	0.117797
1458	S22.22XA	1.17951	3	1	0.645987
1459	S22.22XB	0.0430262	3	1	0.0969201
1460	S22.22XD	0.103408	3	1	0.275695
1461	S22.23XA	2.48066	3	1	0.792808
1462	S22.23XB	0.0629688	3	1	0.132856
1463	S22.24XA	1.89897	3	1	0.704678
1464	S22.24XB	6.61674	3	1	1.11089
1465	S22.24XD	0.575188	3	2	0.551257
1466	S22.31XA	1.08826	3	1	0.618185
1467	S22.31XB	2.35572	3	1	0.688064
1468	S22.31XD	0.0368807	3	1	0.092075
1469	S22.31XS	0.170577	3	2	0.296159
1470	S22.32XA	1.06658	3	1	0.608385
1471	S22.32XB	1.98136	3	1	0.65737
1472	S22.32XD	8.27092	3	1	1.06652
1473	S22.39XA	1.47804	3	1	0.663663
1474	S22.39XB	5.78584	3	1	0.761115
1475	S22.39XD	0.243884	3	2	0.370061
1476	S22.41XA	1.3342	3	1	0.687351
1477	S22.41XB	1.95023	3	1	0.685777
1478	S22.41XD	0.663612	3	1	0.643253
1479	S22.41XG	16.5418	3	2	1.62147
1480	S22.41XK	0.196801	3	2	0.40107
1481	S22.41XS	0.170577	3	2	0.304378
1482	S22.42XA	1.22902	3	1	0.662891
1483	S22.42XB	2.31641	3	1	0.727831
1484	S22.42XD	0.4023	3	1	0.479914
1485	S22.42XG	0.158807	3	1	0.296043
1486	S22.42XK	16.5418	3	1	1.53754
1487	S22.42XS	2.23769	3	1	1.1305
1488	S22.43XA	2.813	3	1	0.838076
1489	S22.43XB	8.28408	3	1	1.2117
1490	S22.43XD	0.128477	3	1	0.219853
1491	S22.43XG	0.227055	3	1	0.337021
1492	S22.43XS	0.498546	3	1	0.540922
1493	S22.49XA	2.10689	3	1	0.75129
1494	S22.49XB	5.01268	3	1	1.05026
1495	S22.49XD	0.765629	3	2	0.656672
1496	S22.49XS	0.0776853	3	1	0.183725
1497	S22.5XXA	3.46412	3	1	0.944239
1498	S22.5XXB	6.25908	3	1	1.19152
1499	S22.9XXA	1.3496	3	1	0.829441
1500	S22000	2.00535	3	1	0.694972
1501	S22001	0.0285501	3	1	0.0936678
1502	S22010	3.57661	3	1	0.763834
1503	S22011	0.0185904	3	1	0.0698097
1504	S22090	4.13546	3	1	0.787862
1505	S22200	3.03019	3	1	0.77421
1506	S22201	0.0180211	3	2	0.0800366
1507	S22300	0.461945	3	1	0.419769
1508	S22301	0.027566	3	1	0.102726
1509	S22400	1.54348	3	1	0.63993
1510	S22401	0.0488413	3	1	0.166329
1511	S22410	2.40036	3	1	0.761964
1512	S22490	0.894154	3	1	0.608686
1513	S22491	0.0329379	3	2	0.128181
1514	S22500	3.33319	3	1	0.840264
1515	S23.0XXA	4.2169	3	1	0.937845
1516	S23.100A	0.0543348	3	2	0.145824
1517	S23.101A	4.3025	3	1	0.768822
1518	S23.110A	6.61674	3	1	1.1891
1519	S23.111A	4.72624	3	1	0.935401
1520	S23.120A	0.0583617	3	1	0.150206
1521	S23.121A	0.37454	3	1	0.391067
1522	S23.122A	4.13546	3	1	1.04665
1523	S23.123A	0.164693	3	2	0.332147
1524	S23.130A	7.35193	3	1	1.14383
1525	S23.131A	2.36312	3	1	0.744407
1526	S23.132A	5.51395	3	1	0.807811
1527	S23.133A	0.0688912	3	1	0.181149
1528	S23.140A	0.121824	3	1	0.249149
1529	S23.141A	0.181477	3	1	0.303162
1530	S23.142A	0.0264635	3	2	0.098953
1531	S23.143A	0.0864743	3	1	0.204182
1532	S23.150A	5.51395	3	1	1.08154
1533	S23.151A	6.61674	3	1	1.10154
1534	S23.152A	0.276033	3	1	0.434821
1535	S23.153A	4.96255	3	1	0.937973
1536	S23.160A	0.0896291	3	1	0.234746
1537	S23.161A	6.91392	3	1	0.952584
1538	S23.162A	2.46007	3	1	0.88355
1539	S23.163A	1.77558	3	1	0.576364
1540	S23.170A	2.37023	3	1	0.83281
1541	S23.171A	1.18921	3	1	0.592164
1542	S23.20XA	5.52906	3	1	0.819005
1543	S23.29XA	0.111446	3	1	0.239909
1544	S23.3XXA	0.592698	3	1	0.436818
1545	S23.3XXD	0.374538	3	2	0.440719
1546	S23.41XA	0.218105	3	1	0.321534
1547	S23.420A	0.182112	3	1	0.226386
1548	S23.421A	0.211388	3	2	0.335477
1549	S23.428A	0.0484035	3	1	0.1176
1550	S23.429A	1.11423	3	1	0.658537
1551	S23.8XXA	0.0660218	3	1	0.163553
1552	S23.9XXA	0.0568992	3	1	0.143538
1553	S231	0.147672	3	2	0.321758
1554	S233	0.103408	3	2	0.220111
1555	S234	0.575188	3	1	0.216
1556	S24.0XXA	2.83106	3	1	0.787101
1557	S24.0XXD	0.535498	3	1	0.556966
1558	S24.101A	2.97454	3	1	0.857058
1559	S24.102A	1.64588	3	1	0.675406
1560	S24.103A	0.985166	3	1	0.586761
1561	S24.103S	0.196801	3	3	0.335421
1562	S24.104A	0.837893	3	1	0.532009
1563	S24.104S	0.0372568	3	2	0.126087
1564	S24.109A	3.03599	3	1	0.761229
1565	S24.111A	8.53954	3	1	1.16775
1566	S24.112A	2.84951	3	1	0.92569
1567	S24.113A	1.15714	3	1	0.626216
1568	S24.114A	1.56156	3	1	0.638663
1569	S24.114S	0.0438433	3	1	0.125465
1570	S24.119A	3.52189	3	1	1.01816
1571	S24.131A	0.109921	3	2	0.222592
1572	S24.132A	3.00761	3	1	1.12752
1573	S24.133A	0.106458	3	1	0.214313
1574	S24.134A	0.0865381	3	1	0.17757
1575	S24.139A	0.119307	3	1	0.242055
1576	S24.142A	0.0543353	3	1	0.150667
1577	S24.143A	0.324633	3	1	0.463065
1578	S24.149A	1.27245	3	1	0.655174
1579	S24.151A	4.83644	3	1	1.03232
1580	S24.152A	0.0601365	3	1	0.166002
1581	S24.152S	0.170576	3	1	0.314718
1582	S24.153A	2.3979	3	1	0.759068
1583	S24.154A	1.44598	3	1	0.608941
1584	S24.154S	0.170576	3	2	0.314718
1585	S24.159A	2.06773	3	1	0.735711
1586	S24.2XXA	1.8905	3	1	0.661456
1587	S24.4XXA	16.5418	3	1	1.20036
1588	S24.8XXA	4.72624	3	1	0.970372
1589	S24.9XXA	0.0284104	3	1	0.0789966
1590	S240	2.5449	3	1	0.640394
1591	S2410	0.0360104	3	1	0.12941
1592	S2418	0.0270444	3	1	0.0896141
1593	S2419	0.122824	3	1	0.159503
1594	S2420	0.0306627	3	2	0.0960574
1595	S25.00XA	5.87063	3	1	1.15939
1596	S25.01XA	4.47871	3	1	1.07978
1597	S25.01XD	0.023036	3	2	0.0797794
1598	S25.02XA	10.1463	3	1	1.32834
1599	S25.09XA	4.89819	3	1	1.09991
1600	S25.101A	6.61674	3	1	1.17223
1601	S25.102A	3.81735	3	1	0.973913
1602	S25.109A	0.0470957	3	2	0.156821
1603	S25.111A	2.06773	3	1	0.840817
1604	S25.112A	4.51141	3	1	1.12171
1605	S25.119A	0.0626881	3	1	0.16052
1606	S25.121A	13.9101	3	1	1.47045
1607	S25.122A	11.0279	3	1	1.35456
1608	S25.129A	16.5418	3	1	1.55429
1609	S25.191A	3.54468	3	1	0.892324
1610	S25.192A	2.28163	3	1	0.679977
1611	S25.199A	4.72624	3	1	1.11753
1612	S25.20XA	19.2988	3	1	1.4182
1613	S25.21XA	11.0279	3	1	1.27647
1614	S25.22XA	23.1586	3	1	1.62257
1615	S25.29XA	8.27092	3	1	0.866171
1616	S25.301A	2.5449	3	1	0.605002
1617	S25.302A	2.36312	3	1	0.857079
1618	S25.309A	8.27092	3	1	1.16593
1619	S25.311A	3.00761	3	1	1.06575
1620	S25.312A	3.30837	3	1	0.932975
1621	S25.319A	3.30837	3	1	1.19906
1622	S25.321A	13.243	3	1	1.42166
1623	S25.322A	12.1887	3	1	1.39026
1624	S25.329A	13.2425	3	1	0.865251
1625	S25.391A	8.27092	3	1	0.965815
1626	S25.392A	5.51395	3	1	0.664896
1627	S25.399A	0.149984	3	2	0.31392
1628	S25.401A	8.27092	3	1	1.10079
1629	S25.402A	5.51395	3	1	1.3
1630	S25.409A	8.28278	3	1	1.38877
1631	S25.411A	9.92511	3	1	1.19255
1632	S25.412A	19.8502	3	1	1.4306
1633	S25.419A	11.8156	3	1	1.2499
1634	S25.421A	23.6312	3	1	1.54343
1635	S25.422A	12.8659	3	1	1.38193
1636	S25.429A	29.4077	3	1	1.68991
1637	S25.491A	3.00761	3	1	0.641837
1638	S25.492A	11.0279	3	1	1.59442
1639	S25.499A	16.5418	3	1	1.53244
1640	S25.501A	4.72624	3	1	1.18708
1641	S25.502A	2.82296	3	1	0.839452
1642	S25.509A	13.2335	3	1	0.6202
1643	S25.511A	6.47289	3	1	1.03696
1644	S25.512A	3.48249	3	1	0.863601
1645	S25.519A	9.45248	3	1	1.11072
1646	S25.591A	13.2335	3	1	1.26062
1647	S25.592A	0.292964	3	1	0.46394
1648	S25.599A	11.0279	3	1	1.34423
1649	S25.801A	9.45248	3	1	1.16574
1650	S25.802A	8.27092	3	1	1.25267
1651	S25.809A	8.70623	3	1	1.27446
1652	S25.811A	5.09135	3	1	1.04279
1653	S25.812A	3.63219	3	1	0.909074
1654	S25.819A	10.4899	3	1	1.31246
1655	S25.891A	4.13156	3	1	0.941618
1656	S25.892A	3.34128	3	1	0.830424
1657	S25.899A	20.7709	3	1	1.69977
1658	S25.90XA	6.61674	3	1	0.956202
1659	S25.91XA	7.35193	3	1	0.929778
1660	S25.99XA	0.948799	3	1	0.765563
1661	S250	3.67596	3	1	1.11271
1662	S251	0.0248101	3	2	0.0846085
1663	S253	0.0265783	3	2	0.110959
1664	S258	4.41116	3	1	0.866344
1665	S259	0.0214475	3	2	0.0831159
1666	S26.00XA	6.00281	3	1	1.10175
1667	S26.01XA	7.5106	3	1	1.16705
1668	S26.020A	6.20446	3	1	1.16573
1669	S26.021A	11.5971	3	1	1.2924
1670	S26.022A	25.3958	3	1	1.64973
1671	S26.09XA	10.3977	3	1	1.2441
1672	S26.10XA	4.44895	3	1	0.951704
1673	S26.11XA	4.13031	3	1	0.935847
1674	S26.12XA	12.1909	3	1	1.30637
1675	S26.19XA	2.37798	3	1	0.759895
1676	S26.90XA	7.83823	3	1	1.17092
1677	S26.91XA	4.35609	3	1	0.948253
1678	S26.92XA	21.805	3	1	1.55274
1679	S26.99XA	6.13188	3	1	1.11742
1680	S26000	4.72624	3	1	1.2235
1681	S26800	3.8922	3	1	1.08176
1682	S26801	0.0553139	3	2	0.185808
1683	S26810	11.0279	3	1	1.3035
1684	S26811	0.0307454	3	1	0.108936
1685	S27.0XXA	1.83438	3	1	0.659954
1686	S27.0XXD	2.20558	3	1	0.875294
1687	S27.0XXS	0.32538	3	2	0.380619
1688	S27.1XXA	3.59795	3	1	0.899869
1689	S27.1XXD	22.0558	3	1	1.05377
1690	S27.1XXS	0.0285478	3	2	0.0997202
1691	S27.2XXA	2.66741	3	1	0.776727
1692	S27.2XXD	0.0329378	3	1	0.100098
1693	S27.301A	4.98025	3	1	1.17084
1694	S27.302A	11.8222	3	1	1.33688
1695	S27.309A	5.52275	3	1	1.0964
1696	S27.311A	1.27687	3	1	0.575709
1697	S27.312A	0.0230387	3	1	0.0907008
1698	S27.319A	16.5418	3	1	1.43263
1699	S27.321A	1.32852	3	1	0.581383
1700	S27.321D	11.0279	3	1	0.991454
1701	S27.321S	0.0153345	3	2	0.0685227
1702	S27.322A	3.43224	3	1	0.829992
1703	S27.322D	16.5418	3	1	1.16786
1704	S27.329A	2.00915	3	1	0.676113
1705	S27.331A	4.41236	3	1	0.872141
1706	S27.332A	7.72983	3	1	1.17251
1707	S27.339A	4.70982	3	1	0.91017
1708	S27.391A	2.54593	3	1	0.855022
1709	S27.392A	6.01522	3	1	1.14612
1710	S27.399A	4.48285	3	1	0.953167
1711	S27.401A	0.0406269	3	2	0.148956
1712	S27.409A	5.09515	3	1	1.11672
1713	S27.419A	0.0139668	3	2	0.0705965
1714	S27.421A	0.184784	3	1	0.25187
1715	S27.422A	0.0543347	3	1	0.168077
1716	S27.429A	0.211387	3	1	0.395641
1717	S27.431A	13.5342	3	1	1.35224
1718	S27.439A	22.0558	3	1	1.6448
1719	S27.491A	0.170576	3	2	0.41053
1720	S27.492A	16.5418	3	1	1.3168
1721	S27.499A	0.629619	3	1	0.732431
1722	S27.50XA	0.0892343	3	1	0.209822
1723	S27.51XA	0.0199673	3	1	0.0970885
1724	S27.52XA	0.089629	3	2	0.279229
1725	S27.53XA	3.00761	3	1	1.0113
1726	S27.59XA	5.0898	3	1	0.886584
1727	S27.60XA	4.60148	3	1	0.893955
1728	S27.63XA	6.79802	3	1	1.01483
1729	S27.69XA	1.29789	3	1	0.663142
1730	S27.802A	8.20068	3	1	1.14656
1731	S27.803A	4.64524	3	1	1.01398
1732	S27.808A	4.33261	3	1	1.05326
1733	S27.808S	0.822375	3	1	0.624241
1734	S27.809A	4.15654	3	1	1.01238
1735	S27.812A	8.70612	3	1	1.09806
1736	S27.812D	0.402299	3	1	0.475112
1737	S27.813A	2.69894	3	1	0.951931
1738	S27.818A	3.05459	3	1	0.886846
1739	S27.819A	2.54616	3	1	1.01645
1740	S27.892A	2.24	3	1	0.763062
1741	S27.893A	9.30479	3	1	1.19964
1742	S27.898A	2.40201	3	1	0.714439
1743	S27.898D	0.0896281	3	1	0.216517
1744	S27.899A	1.94644	3	1	0.68205
1745	S27.9XXA	2.94149	3	1	0.775477
1746	S27000	1.71356	3	1	0.628175
1747	S27001	2.75697	3	1	0.546162
1748	S27100	3.12954	3	1	0.852849
1749	S27101	1.9461	3	1	0.55986
1750	S27200	2.54586	3	1	0.687844
1751	S27201	0.0254422	3	1	0.0717606
1752	S27300	2.518	3	1	0.661266
1753	S27301	0.0297607	3	1	0.0978978
1754	S27310	2.0939	3	1	0.604375
1755	S27311	0.0505852	3	1	0.138443
1756	S27381	1.65418	3	1	0.622988
1757	S27610	0.089628	3	2	0.157884
1758	S27800	1.57541	3	1	0.725283
1759	S27801	4.72624	3	1	0.921633
1760	S27810	0.0285477	3	2	0.113785
1761	S27840	0.170576	3	2	0.405544
1762	S27850	16.5418	3	1	1.39475
1763	S27860	0.147849	3	2	0.257136
1764	S27890	4.06291	3	1	0.927962
1765	S27980	0.144538	3	2	0.26075
1766	S28.0XXA	15.5548	3	1	1.34958
1767	S28.1XXA	2.02788	3	1	0.606155
1768	S28.221A	0.0306626	3	2	0.115065
1769	S28.222A	0.0306625	3	2	0.0981808
1770	S29.001A	1.78933	3	1	0.609449
1771	S29.002A	0.0346487	3	1	0.0909391
1772	S29.009A	2.06958	3	1	0.623932
1773	S29.011A	0.426897	3	1	0.36614
1774	S29.012A	0.267206	3	1	0.312659
1775	S29.019A	0.130992	3	1	0.238702
1776	S29.021A	1.17435	3	1	0.556386
1777	S29.022A	0.0306662	3	1	0.0785532
1778	S29.029A	4.87123	3	1	0.716875
1779	S29.091A	4.83388	3	1	0.866007
1780	S29.092A	3.00761	3	1	0.769304
1781	S29.099A	1.35035	3	1	0.614297
1782	S29.8XXA	1.80953	3	1	0.655963
1783	S29.8XXD	0.0408185	3	1	0.099588
1784	S29.9XXA	1.07777	3	1	0.562227
1785	S29.9XXD	0.464145	3	1	0.496473
1786	S2900	0.154984	3	1	0.185499
1787	S297	0.103409	3	1	0.222684
1788	S298	4.13546	3	1	0.843842
1789	S299	0.0621334	3	2	0.170634
1790	S30.0XXA	1.42493	7	1	0.664367
1791	S30.0XXD	0.369689	7	1	0.484941
1792	S30.0XXS	0.0130029	7	2	0.0539244
1793	S30.1XXA	1.19016	4	1	0.555917
1794	S30.1XXD	0.0588617	4	2	0.152448
1795	S30.201A	2.5449	4	1	0.694735
1796	S30.202A	1.06793	4	1	0.42263
1797	S30.21XA	1.85284	4	1	0.623193
1798	S30.22XA	1.84701	4	1	0.658956
1799	S30.22XD	0.402299	4	1	0.467873
1800	S30.23XA	0.591131	4	1	0.404871
1801	S30.3XXA	0.111074	4	1	0.221882
1802	S30.810A	0.989113	4	1	0.499701
1803	S30.810S	0.0214474	4	2	0.0785703
1804	S30.811A	0.948114	4	1	0.487829
1805	S30.811S	0.128146	4	1	0.25703
1806	S30.812A	0.848763	4	1	0.465004
1807	S30.813A	1.62707	4	1	0.627994
1808	S30.814A	0.0075955	4	1	0.0333093
1809	S30.815A	0.0350678	4	2	0.108696
1810	S30.816A	0.983052	4	1	0.640338
1811	S30.817A	0.71936	4	1	0.45942
1812	S30.820A	0.0353788	4	2	0.110164
1813	S30.821A	0.374538	4	2	0.450524
1814	S30.841A	0.535498	4	1	0.684957
1815	S30.850A	0.106458	4	2	0.214207
1816	S30.851A	2.20558	4	1	0.628963
1817	S30.852A	0.0748007	4	1	0.128944
1818	S30.853A	0.0214473	4	2	0.0804673
1819	S30.854A	0.0353778	4	1	0.106521
1820	S30.857A	0.0442954	4	2	0.106575
1821	S30.860D	0.324633	4	2	0.430747
1822	S30.870A	0.0167113	4	1	0.061532
1823	S30.871A	0.0952741	4	1	0.211996
1824	S30.91XA	0.854006	7	1	0.512672
1825	S30.92XA	0.908352	4	1	0.480913
1826	S30.93XA	0.0318533	4	1	0.0870788
1827	S30.94XA	5.17032	4	1	0.737216
1828	S30.95XA	6.62087	4	1	0.91784
1829	S30.96XA	16.5418	4	1	1.08776
1830	S30.98XA	11.0279	4	1	1.44694
1831	S300	0.0505861	4	2	0.133657
1832	S301	4.04356	4	1	0.777384
1833	S3020	1.09466	4	2	0.711157
1834	S3021	0.0773653	4	1	0.181622
1835	S3022	0.0185897	4	2	0.0800838
1836	S3028	1.09466	4	1	0.724453
1837	S3080	0.0781195	4	1	0.177519
1838	S3088	0.0408207	7	1	0.119962
1839	S309	0.402299	7	2	0.61618
1840	S31.000A	0.320346	4	1	0.35554
1841	S31.001A	1.65509	4	1	0.626027
1842	S31.010A	0.960814	4	1	0.407003
1843	S31.010D	0.0185896	4	2	0.0567099
1844	S31.011A	1.61514	4	1	0.618388
1845	S31.020A	1.37939	4	1	0.584578
1846	S31.021A	3.68674	4	1	0.995768
1847	S31.030A	0.0302006	7	1	0.0925351
1848	S31.031A	2.54806	4	1	0.679957
1849	S31.040A	0.0249959	7	1	0.0890511
1850	S31.041A	1.74125	4	1	0.667915
1851	S31.050A	0.0834438	7	2	0.178339
1852	S31.100A	0.0289379	4	1	0.0951279
1853	S31.101A	0.040387	4	1	0.108818
1854	S31.102A	1.54318	4	1	0.531196
1855	S31.103A	2.17111	4	1	0.64189
1856	S31.104A	0.0230085	4	1	0.0832794
1857	S31.105A	1.57628	4	1	0.518435
1858	S31.109A	1.60311	4	1	0.575565
1859	S31.109S	0.0104924	4	2	0.0439806
1860	S31.110A	0.841858	4	1	0.351358
1861	S31.111A	0.129284	4	1	0.18602
1862	S31.111D	1.93952	4	1	1.16246
1863	S31.112A	0.279724	4	1	0.262634
1864	S31.113A	0.922566	4	1	0.3566
1865	S31.114A	0.0802443	4	1	0.15178
1866	S31.115A	0.374014	4	1	0.302485
1867	S31.119A	1.29358	4	1	0.473967
1868	S31.119D	0.147849	4	2	0.282659
1869	S31.120A	1.32634	4	1	0.514504
1870	S31.121A	0.0354226	4	1	0.0920571
1871	S31.122A	0.0297491	4	1	0.0783394
1872	S31.123A	1.75122	4	1	0.595031
1873	S31.124A	1.79164	4	1	0.581824
1874	S31.125A	0.0356181	4	1	0.11102
1875	S31.129A	0.0202974	4	1	0.0675775
1876	S31.130A	0.562084	4	1	0.355878
1877	S31.130D	0.147849	4	1	0.230617
1878	S31.131A	0.747053	4	1	0.425058
1879	S31.132A	1.46246	4	1	0.470414
1880	S31.133A	0.974257	4	1	0.467641
1881	S31.134A	0.645182	4	1	0.386716
1882	S31.135A	0.0253674	4	1	0.0858762
1883	S31.139A	0.541266	4	1	0.392093
1884	S31.140A	2.00751	4	1	0.647566
1885	S31.141A	0.898001	4	1	0.496587
1886	S31.142A	0.0237354	4	1	0.0811761
1887	S31.143A	0.0192724	4	1	0.0735391
1888	S31.144A	0.0267261	4	1	0.0928717
1889	S31.145A	0.0300485	4	1	0.100481
1890	S31.149A	1.06882	4	1	0.557013
1891	S31.152A	0.0247439	4	1	0.0693466
1892	S31.154A	0.0265782	4	1	0.0870884
1893	S31.159A	0.0505839	4	2	0.121494
1894	S31.20XA	1.07425	4	1	0.536973
1895	S31.21XA	0.710209	4	1	0.4573
1896	S31.22XA	0.0306668	4	1	0.101471
1897	S31.23XA	0.0423338	4	1	0.129083
1898	S31.24XA	0.0534262	4	1	0.144491
1899	S31.25XA	0.0444961	4	1	0.10124
1900	S31.30XA	0.974998	4	1	0.558411
1901	S31.31XA	1.10289	4	1	0.540673
1902	S31.32XA	0.0342373	4	1	0.110407
1903	S31.33XA	0.409364	4	1	0.426406
1904	S31.34XA	1.228	4	1	0.573871
1905	S31.40XA	0.0153631	4	1	0.0541785
1906	S31.41XA	0.321251	4	1	0.317662
1907	S31.42XA	0.0303997	4	1	0.093789
1908	S31.43XA	0.227052	4	1	0.296565
1909	S31.44XA	0.0306642	4	1	0.100262
1910	S31.501A	0.0393272	4	1	0.116409
1911	S31.502A	8.2748	4	1	0.90978
1912	S31.511A	0.035846	4	1	0.107787
1913	S31.512A	0.662102	4	1	0.399824
1914	S31.521A	0.0603643	4	1	0.161155
1915	S31.522A	0.022183	4	1	0.0633403
1916	S31.531A	0.0511762	4	1	0.145303
1917	S31.541A	0.0438496	4	1	0.095153
1918	S31.542A	0.0185895	4	1	0.0909937
1919	S31.600A	1.87624	4	1	0.71436
1920	S31.601A	1.71282	4	1	0.388442
1921	S31.602A	1.1864	4	1	0.406922
1922	S31.603A	1.9189	4	1	0.599838
1923	S31.604A	2.7872	4	1	0.662078
1924	S31.605A	0.0262901	4	1	0.0905482
1925	S31.609A	1.72592	4	1	0.482534
1926	S31.609D	0.0380003	4	2	0.142278
1927	S31.610A	0.487137	4	1	0.325562
1928	S31.611A	1.8653	4	1	0.451528
1929	S31.612A	1.57723	4	1	0.506522
1930	S31.612D	0.0253183	4	1	0.0639429
1931	S31.613A	1.11608	4	1	0.500274
1932	S31.614A	0.409101	4	1	0.31883
1933	S31.615A	0.0306337	4	1	0.0863539
1934	S31.619A	1.4092	4	1	0.583826
1935	S31.620A	2.54997	4	1	0.842826
1936	S31.621A	3.02083	4	1	0.699923
1937	S31.622A	0.132768	4	1	0.243879
1938	S31.623A	1.01014	4	1	0.502692
1939	S31.624A	2.5536	4	1	0.715679
1940	S31.625A	3.3136	4	1	0.765417
1941	S31.629A	2.14933	4	1	0.669022
1942	S31.630A	0.921441	4	1	0.372602
1943	S31.631A	1.4832	4	1	0.478191
1944	S31.632A	4.14155	4	1	0.560874
1945	S31.633A	3.73829	4	1	0.750677
1946	S31.634A	0.745172	4	1	0.424861
1947	S31.634D	0.0306624	4	2	0.0827489
1948	S31.635A	2.65159	4	1	0.431249
1949	S31.639A	1.50416	4	1	0.481911
1950	S31.640A	0.0334317	4	1	0.108465
1951	S31.641A	1.98797	4	1	0.629359
1952	S31.642A	3.01093	4	1	0.698758
1953	S31.643A	1.53019	4	1	0.641157
1954	S31.644A	1.8397	4	1	0.653218
1955	S31.645A	0.0497246	4	1	0.139885
1956	S31.649A	2.64814	4	1	0.702623
1957	S31.801A	2.27093	2	1	0.642078
1958	S31.802A	2.4008	2	1	0.61632
1959	S31.803A	0.0297454	2	1	0.0984206
1960	S31.804A	1.84929	2	1	0.652951
1961	S31.805A	0.0626865	2	2	0.156207
1962	S31.809A	1.36163	2	1	0.571824
1963	S31.811A	0.617493	2	1	0.467786
1964	S31.812A	0.789058	2	1	0.502955
1965	S31.813A	0.714731	2	1	0.496613
1966	S31.814A	1.01359	2	1	0.547534
1967	S31.819A	1.99762	2	1	0.636998
1968	S31.821A	0.830389	2	1	0.504285
1969	S31.822A	2.58532	2	1	0.662019
1970	S31.823A	0.901076	2	1	0.525862
1971	S31.824A	0.642988	2	1	0.480311
1972	S31.829A	2.11222	2	1	0.635452
1973	S31.831A	0.223753	4	1	0.286795
1974	S31.832A	1.95543	4	1	0.534341
1975	S31.833A	0.0277638	4	1	0.0910118
1976	S31.834A	0.0583606	4	2	0.191894
1977	S31.839A	4.73857	4	1	0.848354
1978	S31000	0.0353992	7	1	0.0942415
1979	S31001	0.0173073	7	2	0.066672
1980	S31100	0.0748006	4	1	0.175572
1981	S31190	0.0285486	4	2	0.0974279
1982	S31200	0.0361988	4	2	0.117958
1983	S31300	0.0531194	4	1	0.138767
1984	S31400	4.7355	4	1	0.978875
1985	S31500	11.0279	4	1	0.814901
1986	S31800	0.341897	4	1	0.254844
1987	S31801	0.170576	4	1	0.227845
1988	S32.000A	0.586452	4	1	0.533204
1989	S32.000B	0.374538	4	2	0.455965
1990	S32.001A	0.561149	4	1	0.518104
1991	S32.001B	0.0173072	4	2	0.0761414
1992	S32.002A	0.152886	4	1	0.268897
1993	S32.008A	1.5423	4	1	0.671735
1994	S32.008B	0.0570566	4	1	0.156163
1995	S32.008D	0.432116	4	2	0.512468
1996	S32.009A	1.61757	4	1	0.665261
1997	S32.009B	0.20748	4	1	0.341196
1998	S32.010A	0.703599	4	1	0.554484
[truncated: 6,536 more rows]

## Sheet: Calculate IMP-ICDX
			Calculate IMP-ICDX
	Order	Patient	Predictor	Coefficients	ICD-10-CM	BR	WMDP
	1	Injury1	WMDP1	4.96954	S35.311A	4	1.38218
	2	Injury2	WMDP2	2.23149	T79.4XXA	7	1.31097
	3	Injury3	WMDP3	0.411117	S36.430A	4	1.11611
	4	Injury4	WMDP4	0.310673	S36.898A	4	0.855204
	5	Injury5	WMDP5	0.390475	S36.039A	4	0.82521
	6		WMDP1×WMDP2	-0.755072
	7	Same region	S	-0.211965			0
	8	NBR	ln(NBR)	-2.48708			8
	9		NBR^0.382	2.61467
	10		Constant	-10.7138
	11	For example, Inc_key = 160462662			IMP-ICDX=		-0.626519
